# Supplementary material for: The first PdO nanoparticle catalyzed one pot synthesis of propargylamine through A3-coupling of an aldehyde, alkyne and amine
Source: Royal Society of Chemistry journal article supplement (doi:10.1039/d1nj02994k), 2021-01-01

**The first PdO nanoparticles catalyzed one pot synthesis of propargylamine  
through A<sup>3</sup>-coupling aldehyde, alkyne and amine**

T. Krishnaveni<sup>a</sup>, M.V. Kaveri<sup>a</sup>, K. Kadirvelu<sup>b</sup>

<sup>a</sup>Department of Chemistry, Bharathiar University Coimbatore -641046, India

<sup>b</sup>DRDO-BU Center for Life Sciences, Bharathiar University Campus, Coimbatore -641046, India

Corresponding author e-mail: [kadirvelukrishna@yahoo.com](mailto:kadirvelukrishna@yahoo.com), Ph: +91-9791907034

# GC-MS data of A<sup>3</sup>-coupled products

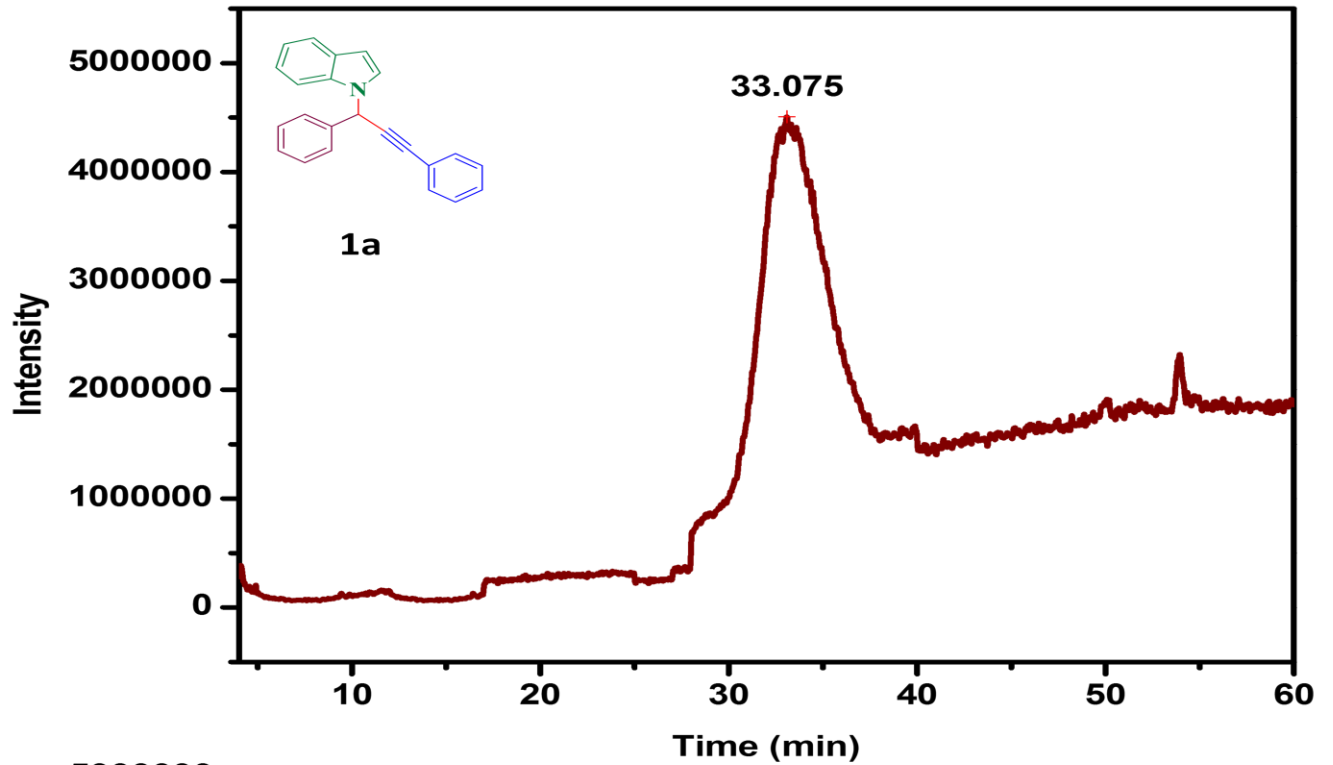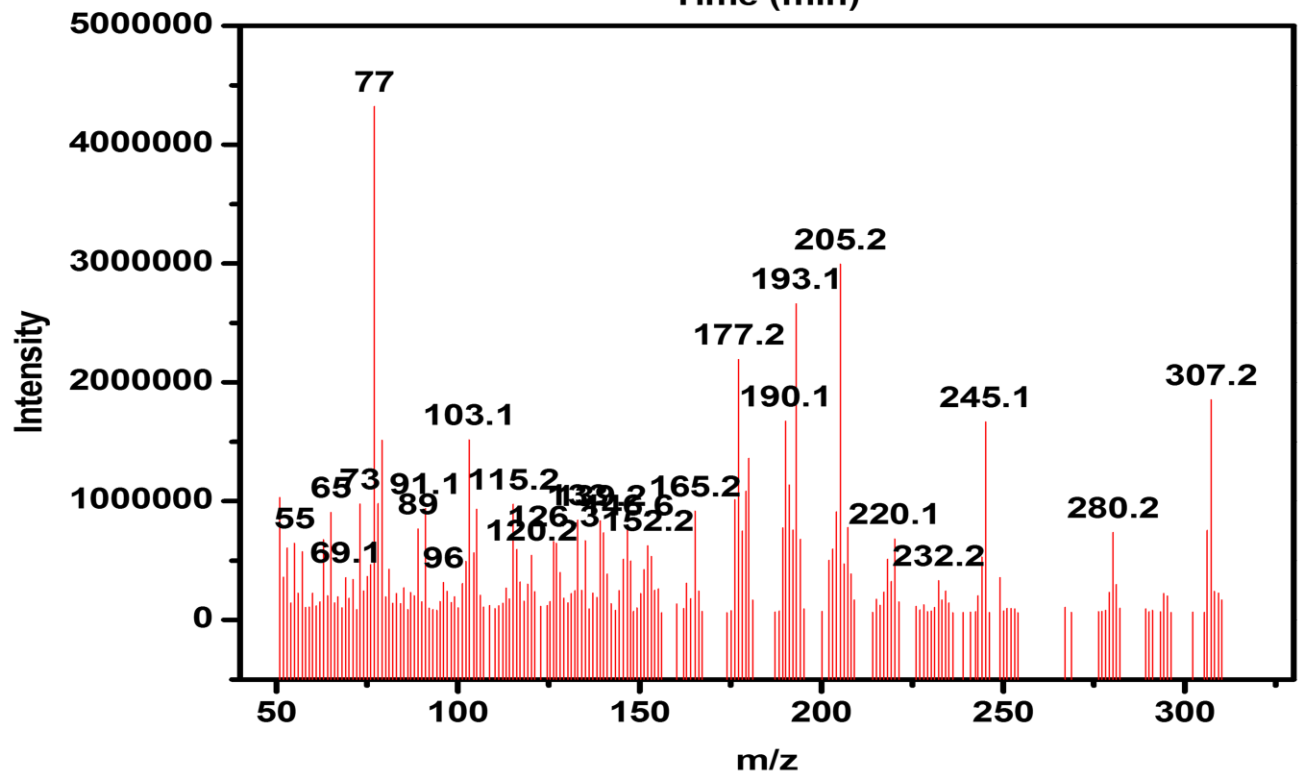

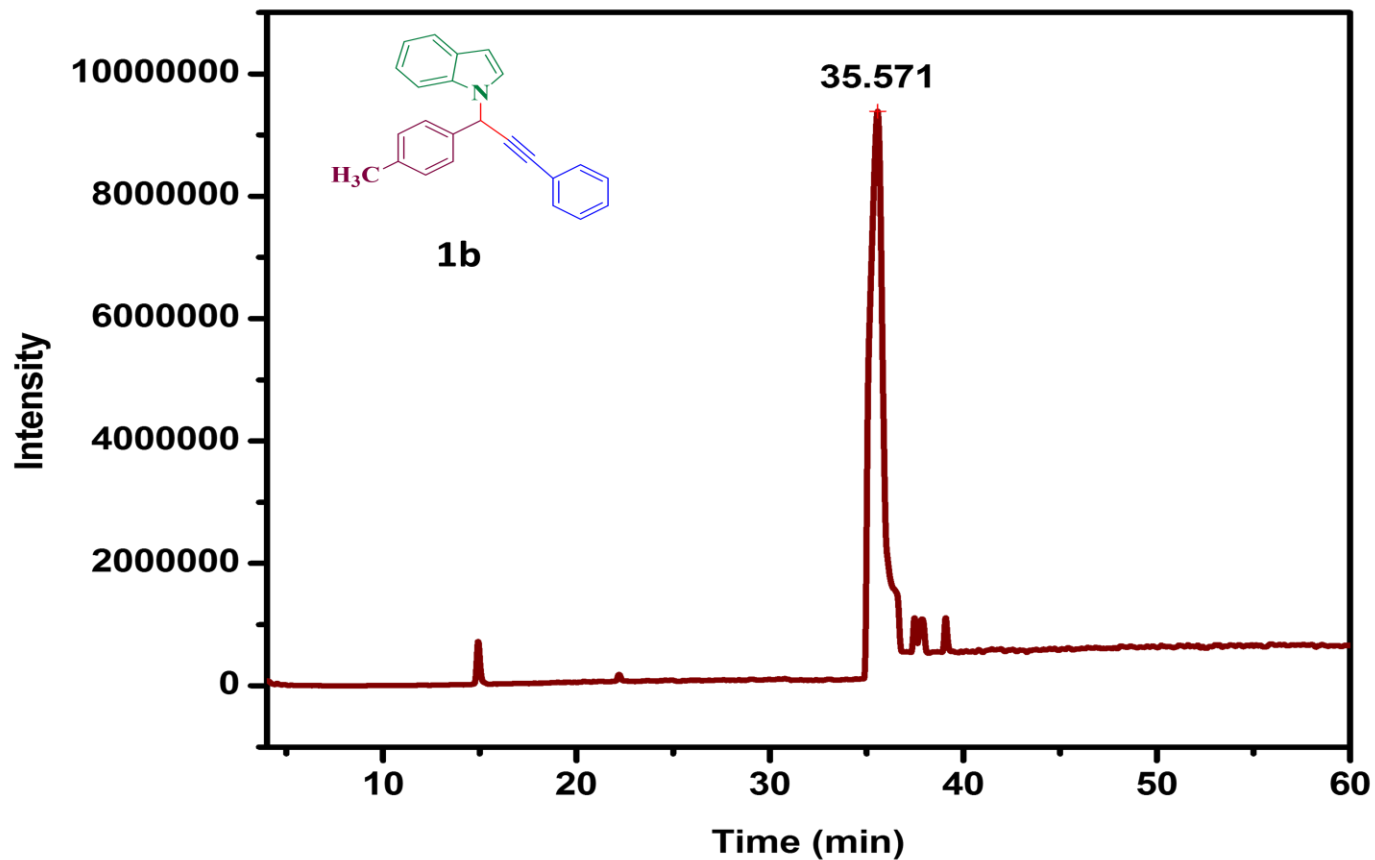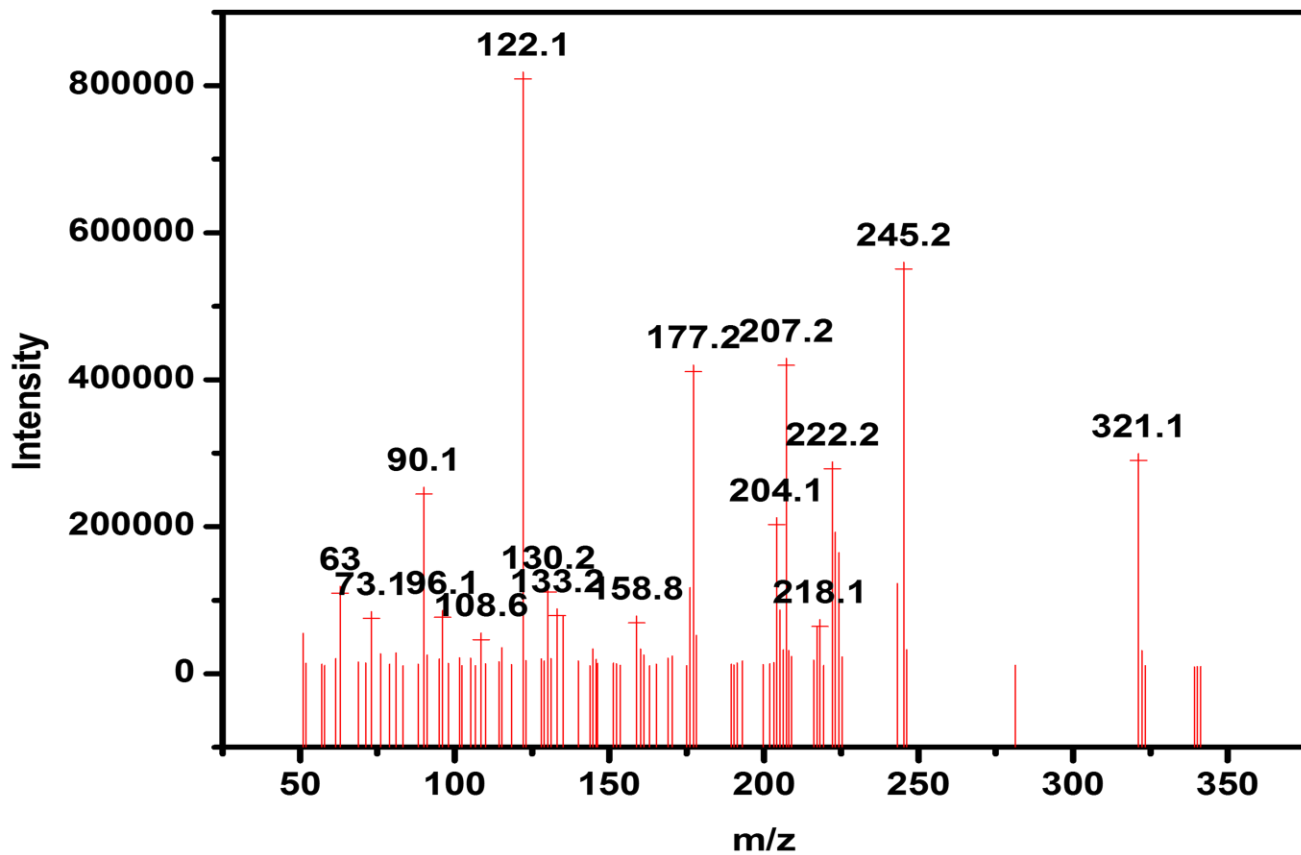

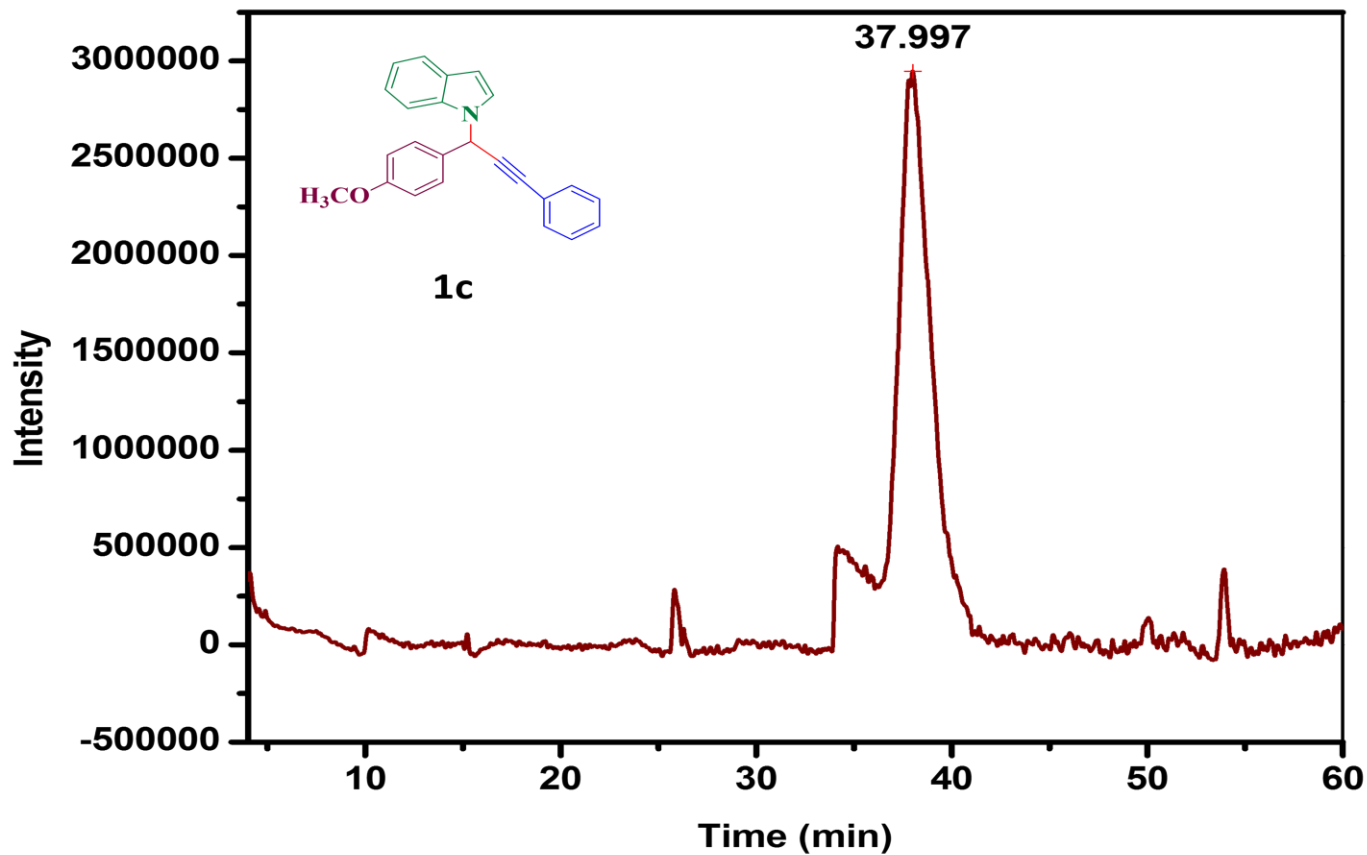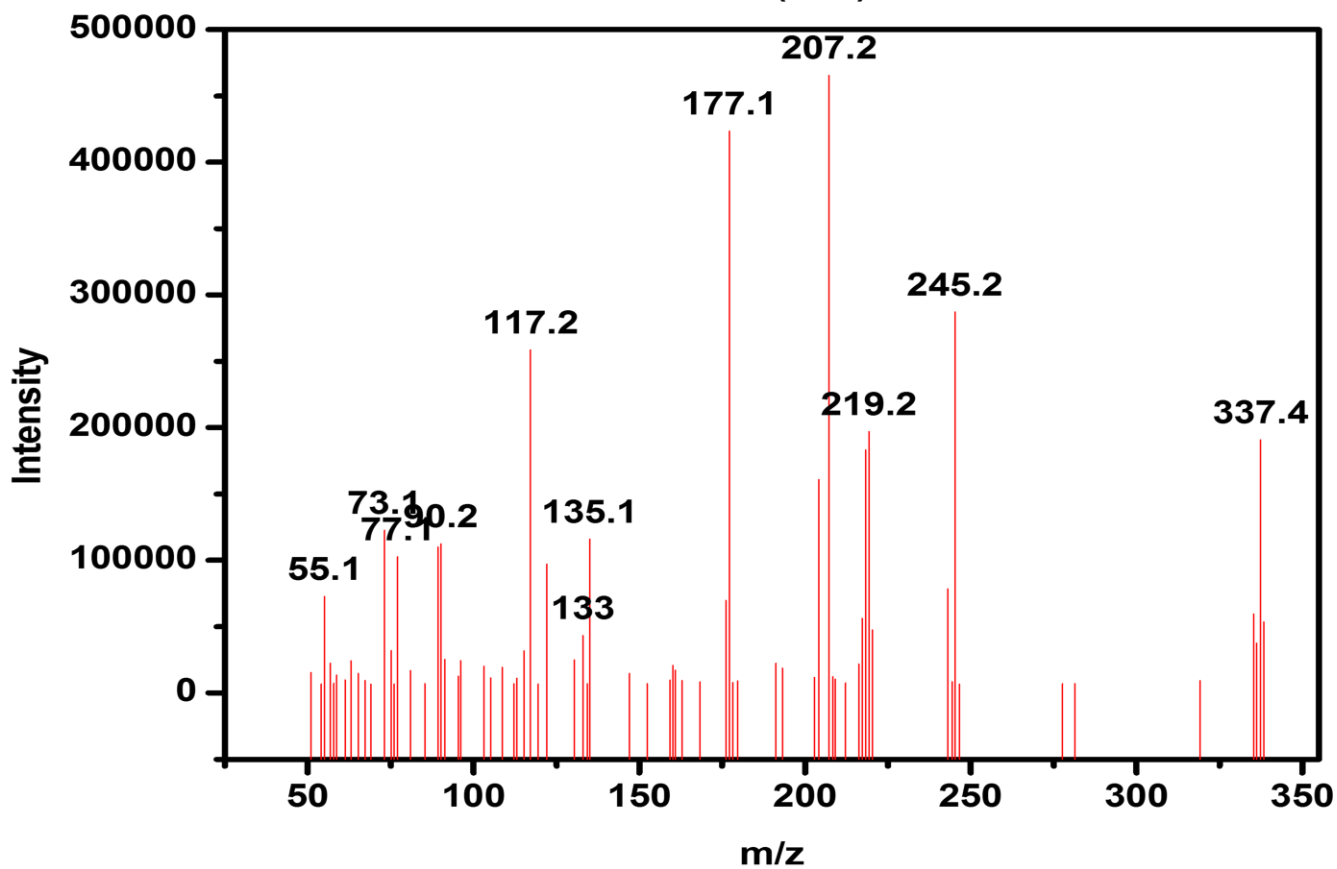

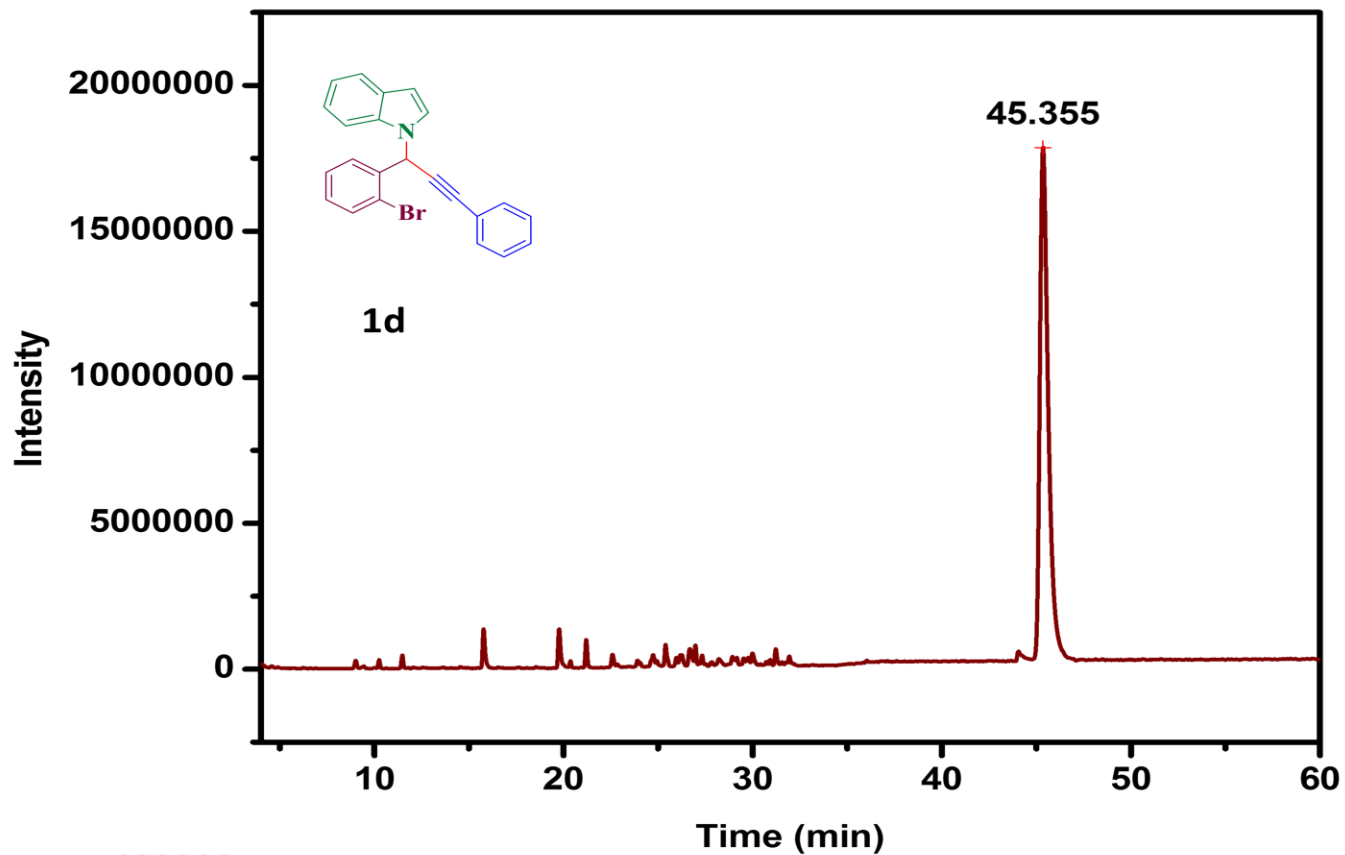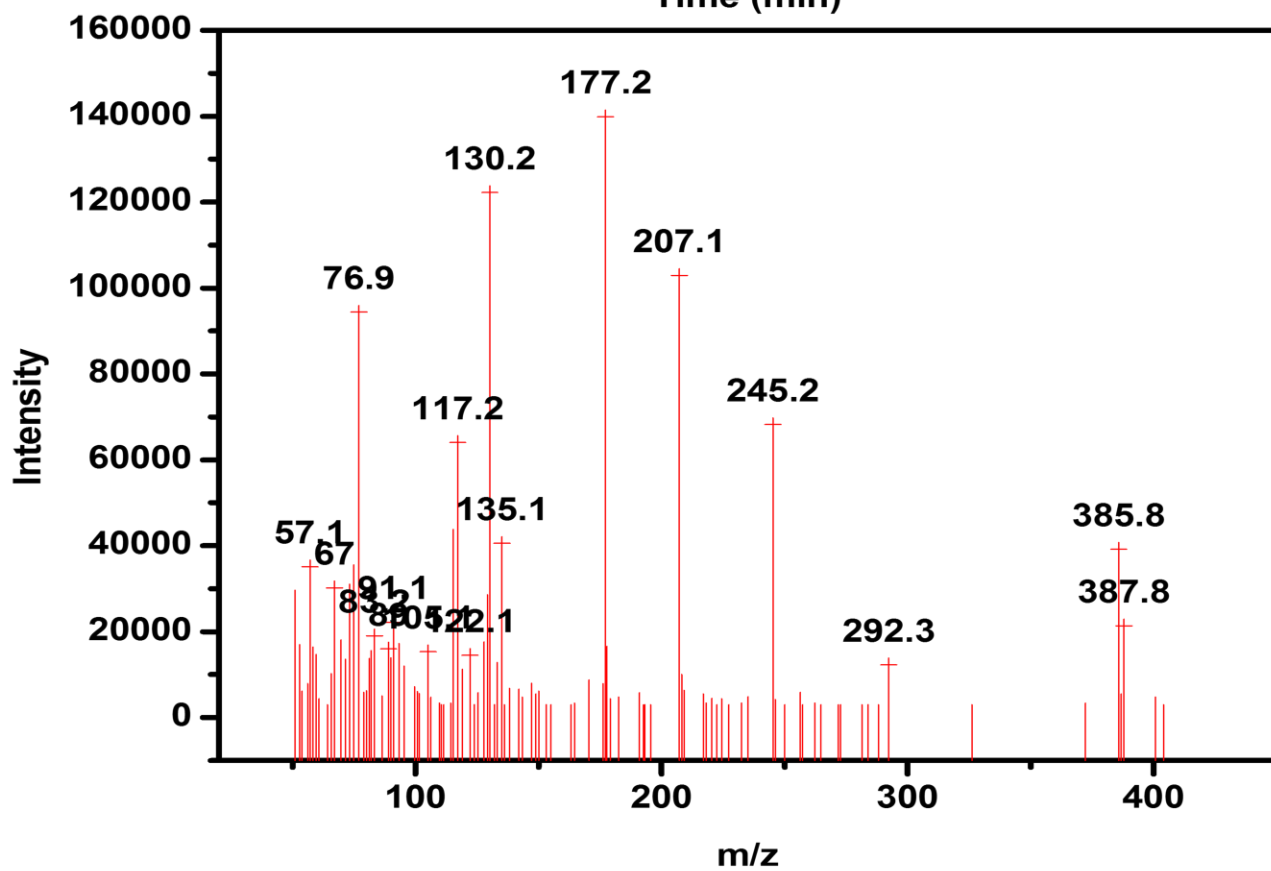

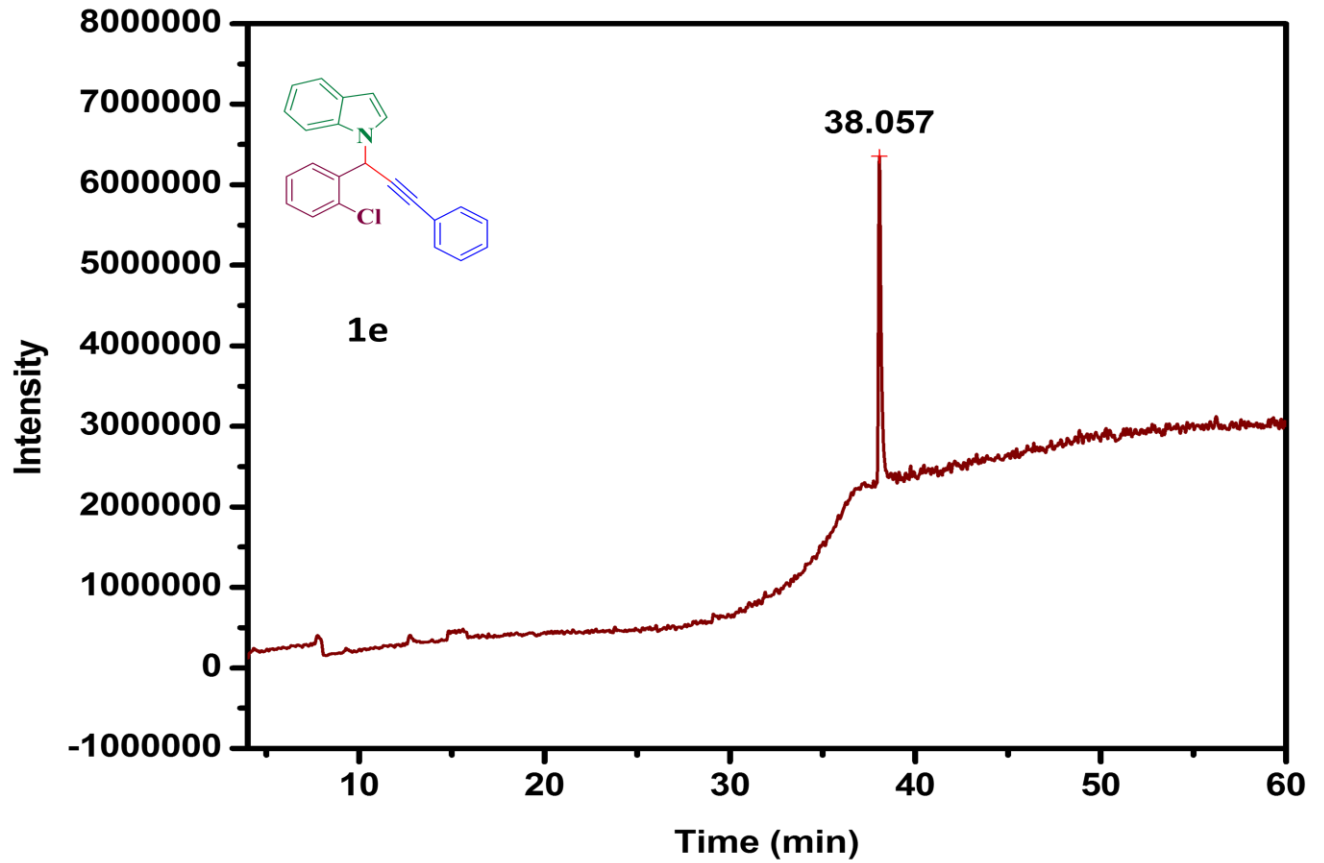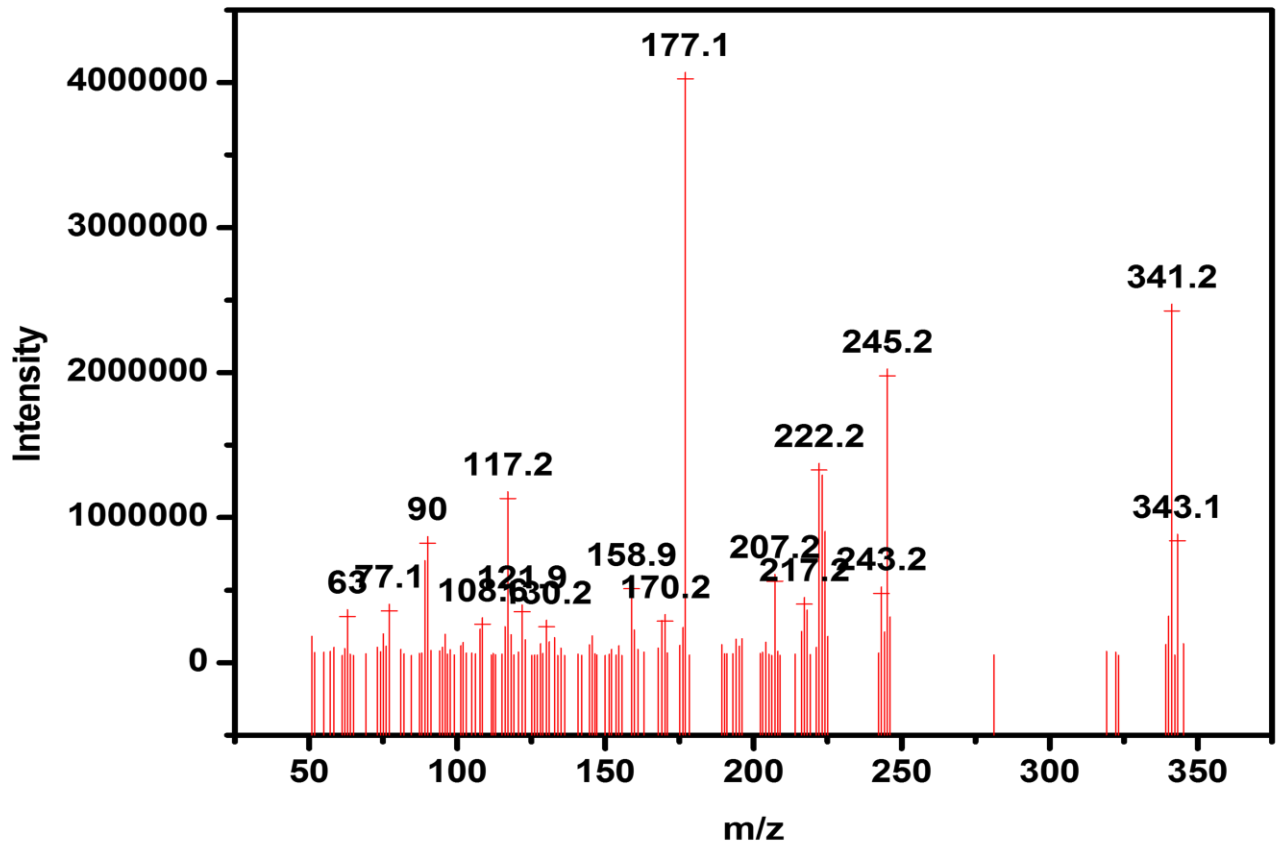

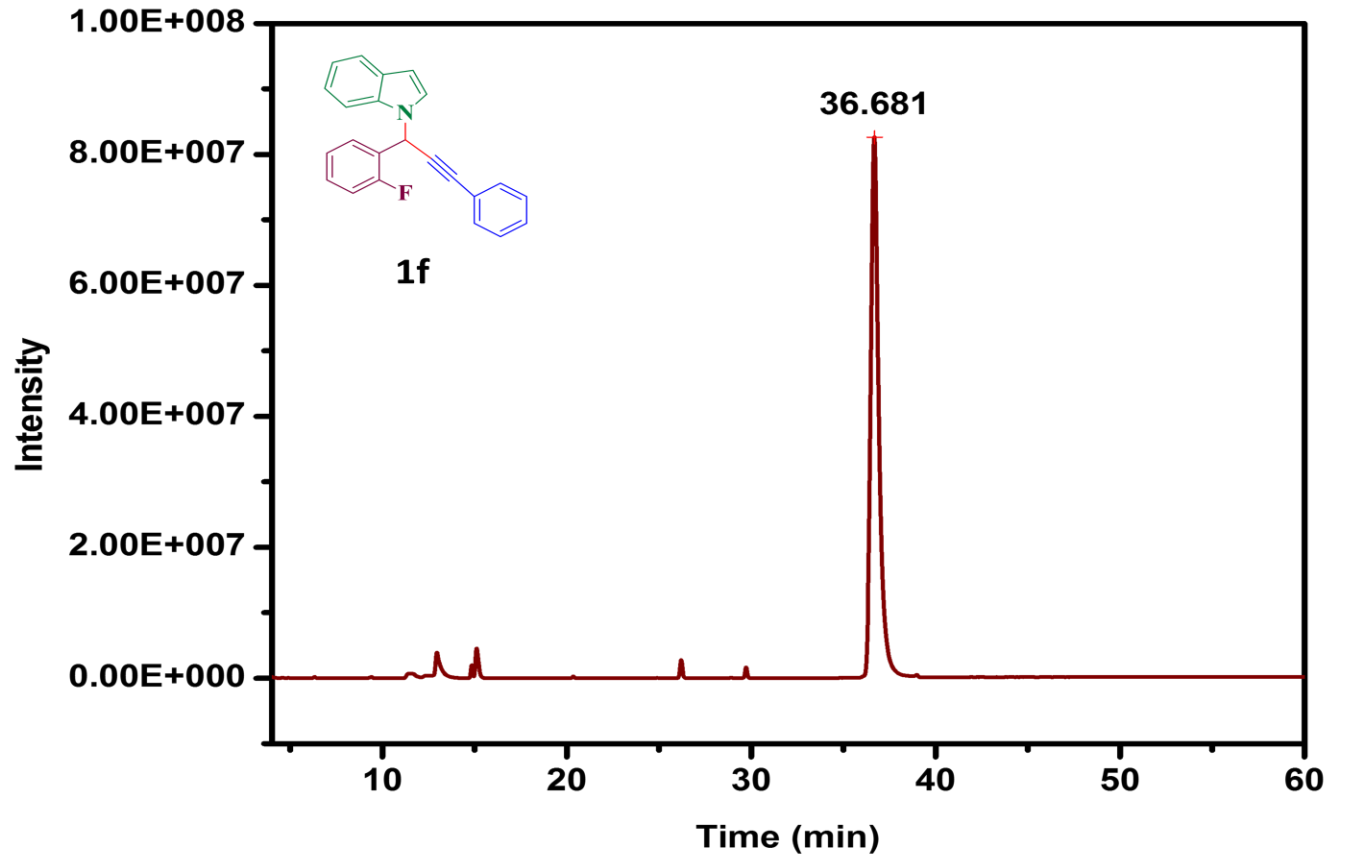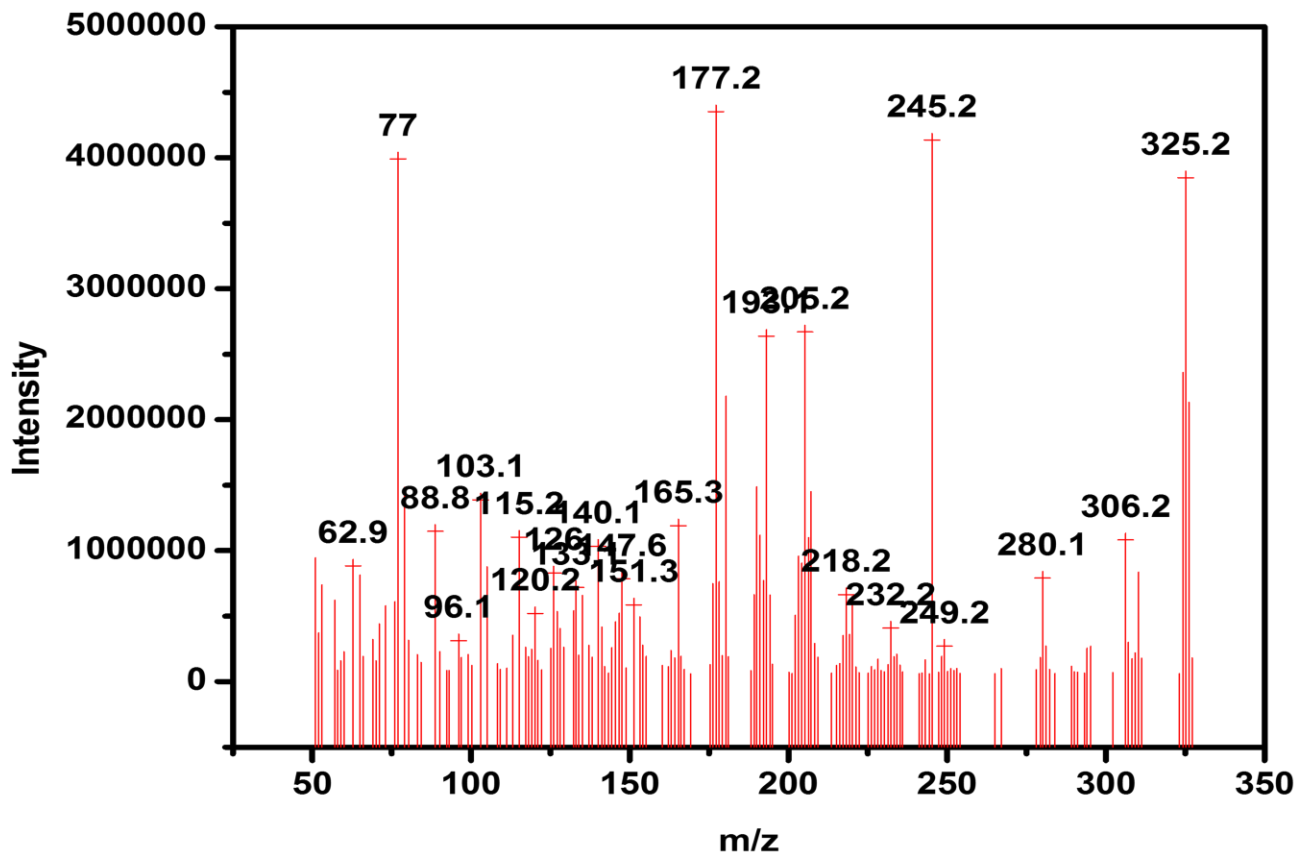

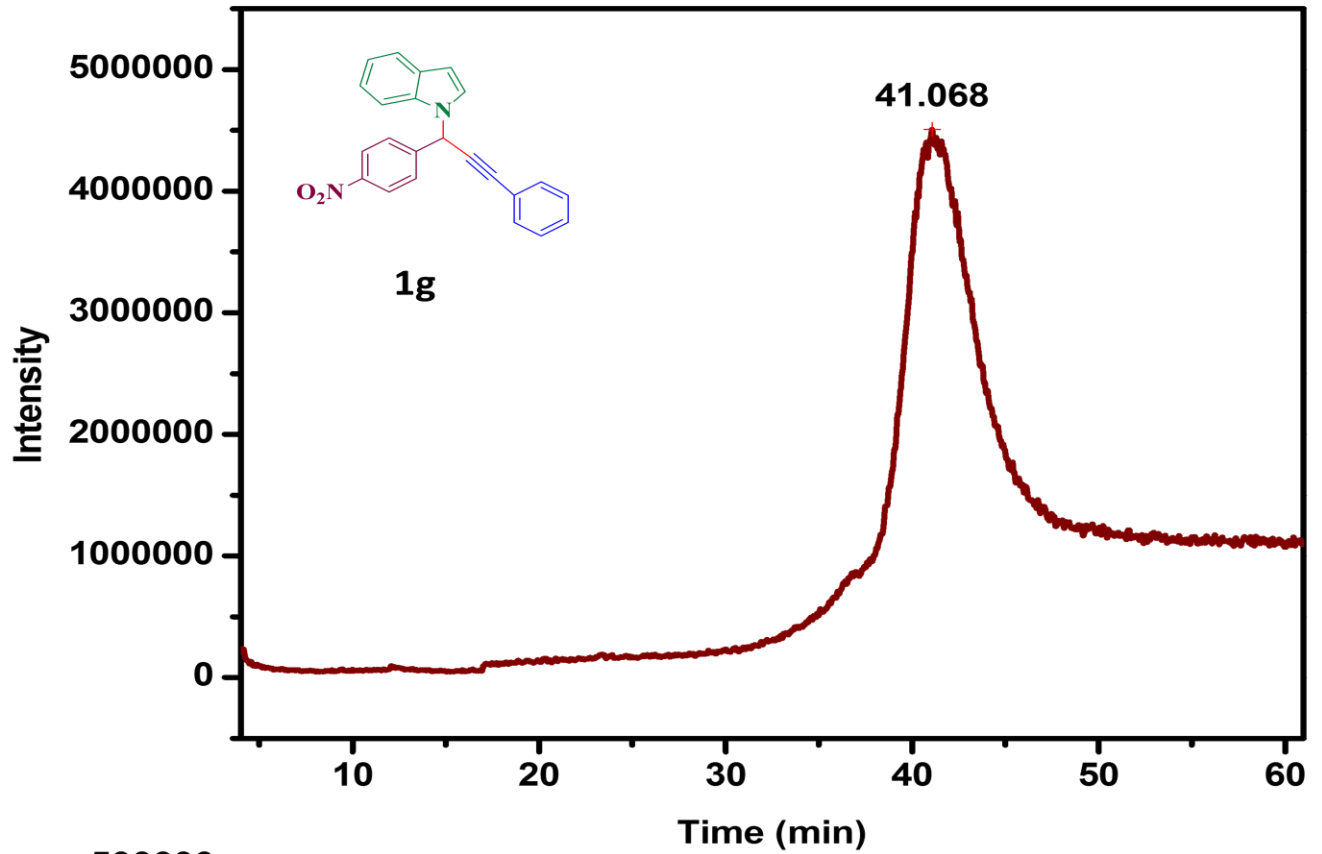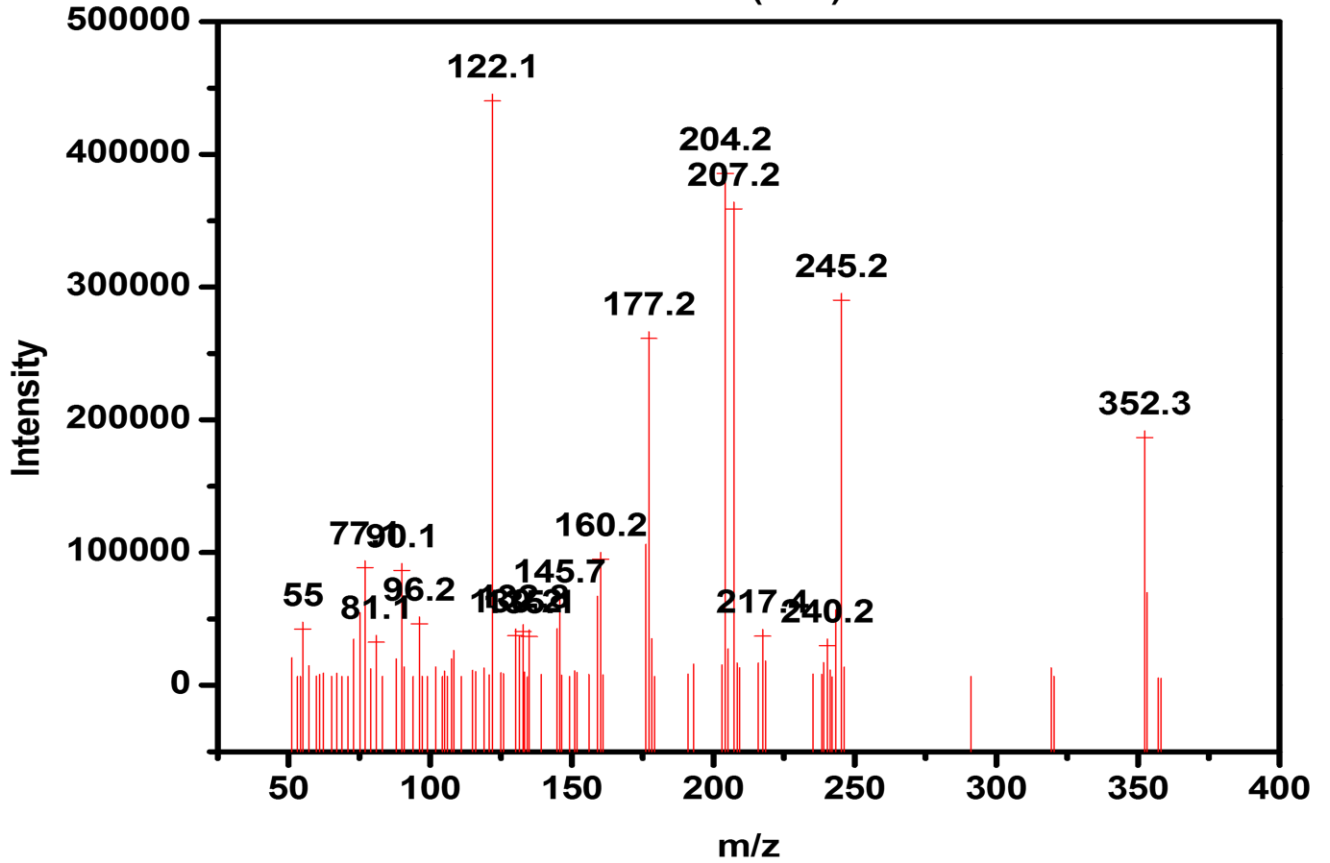



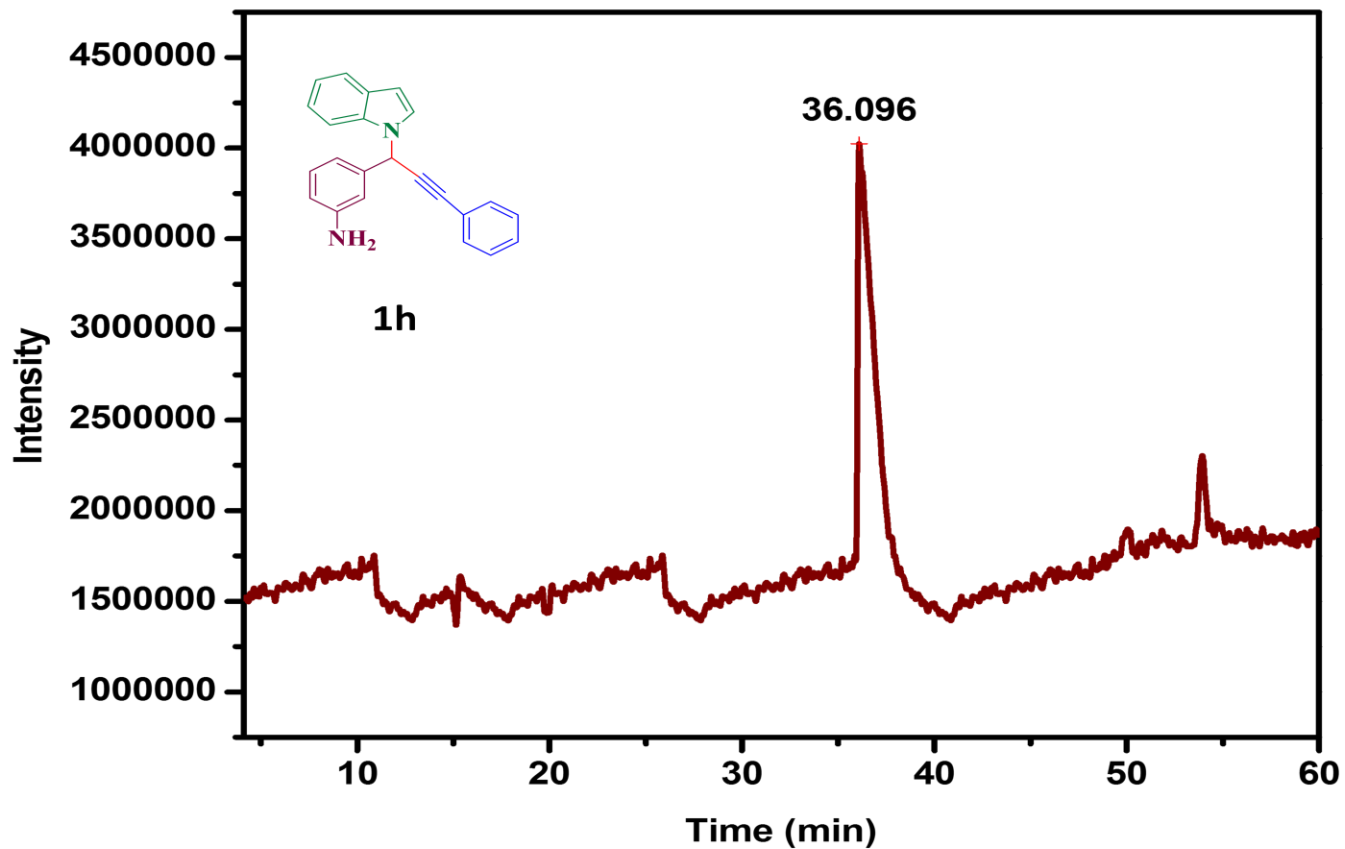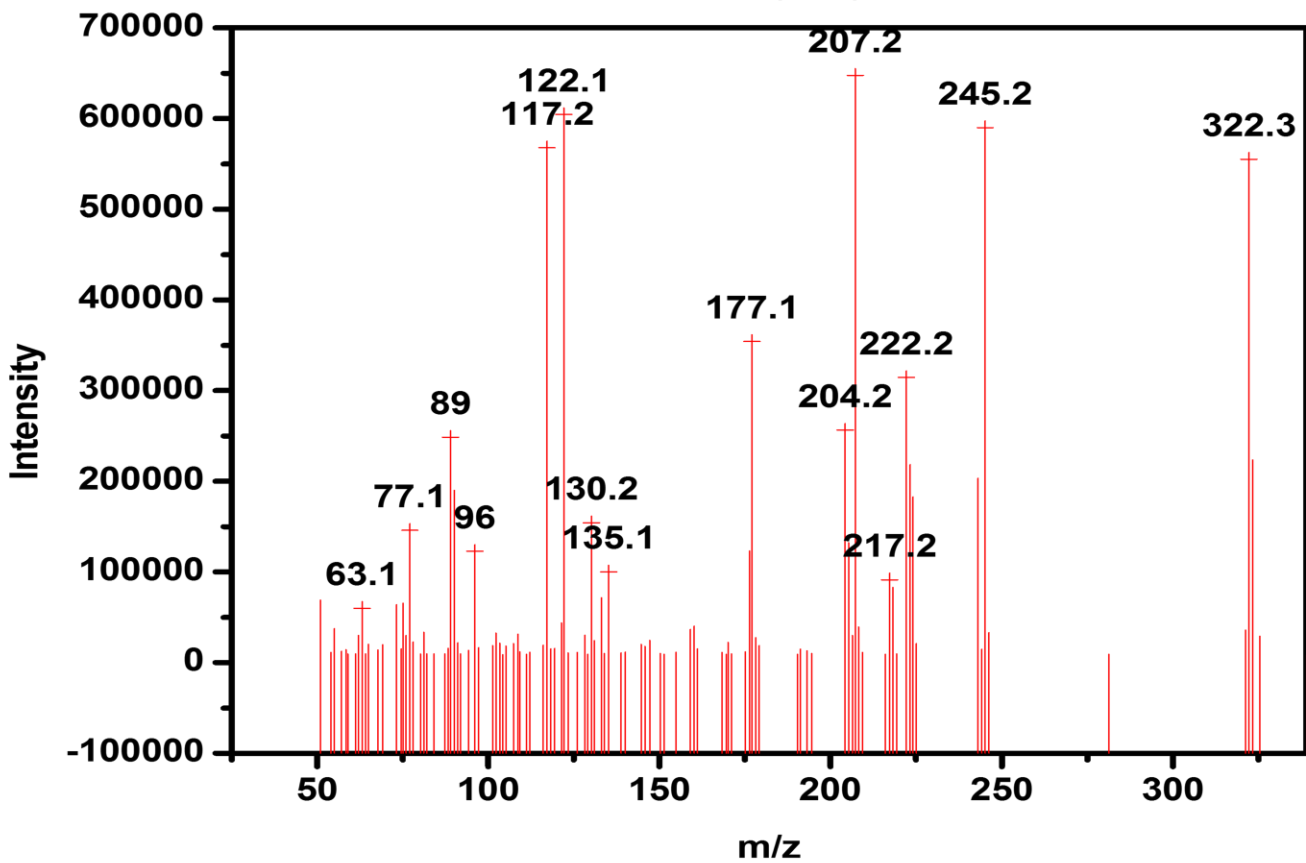

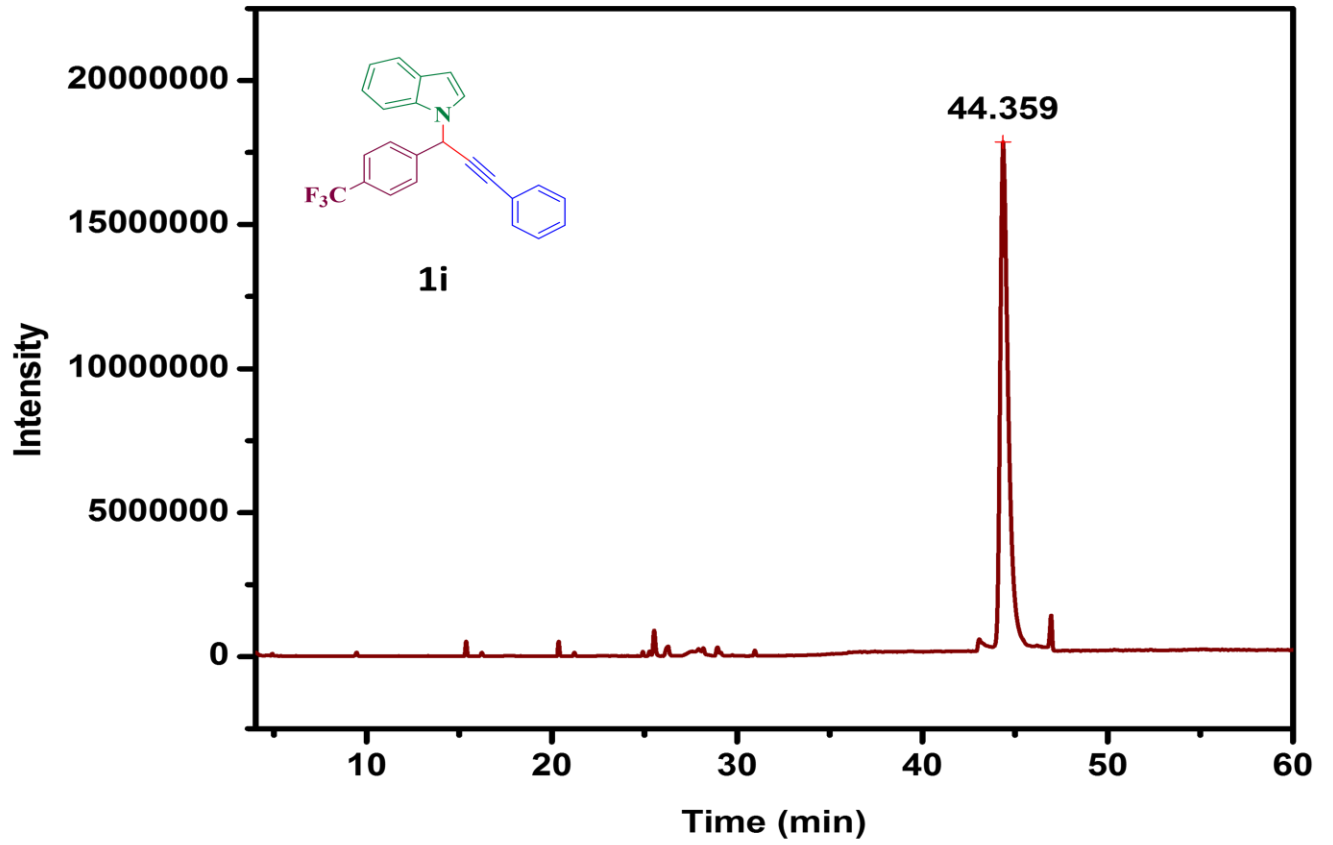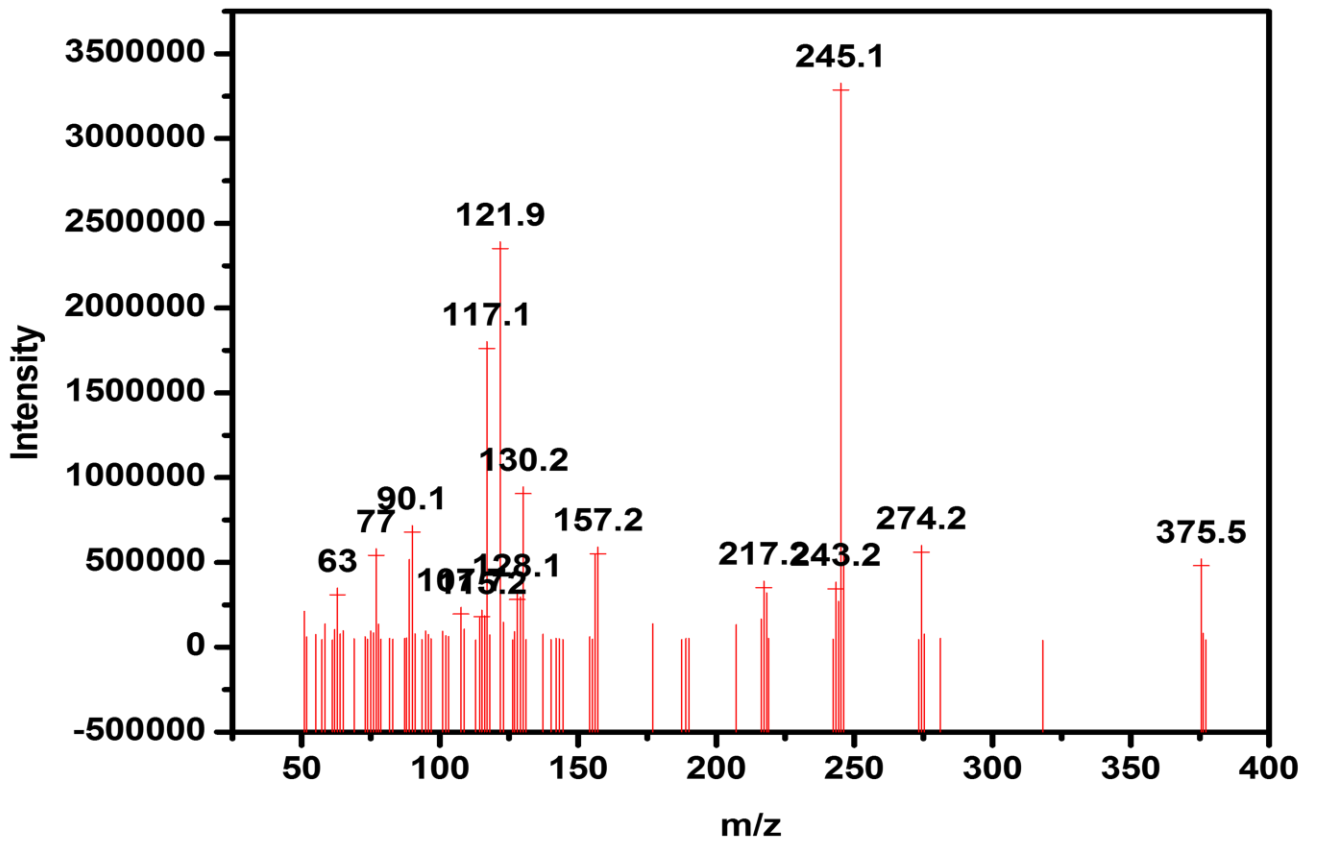

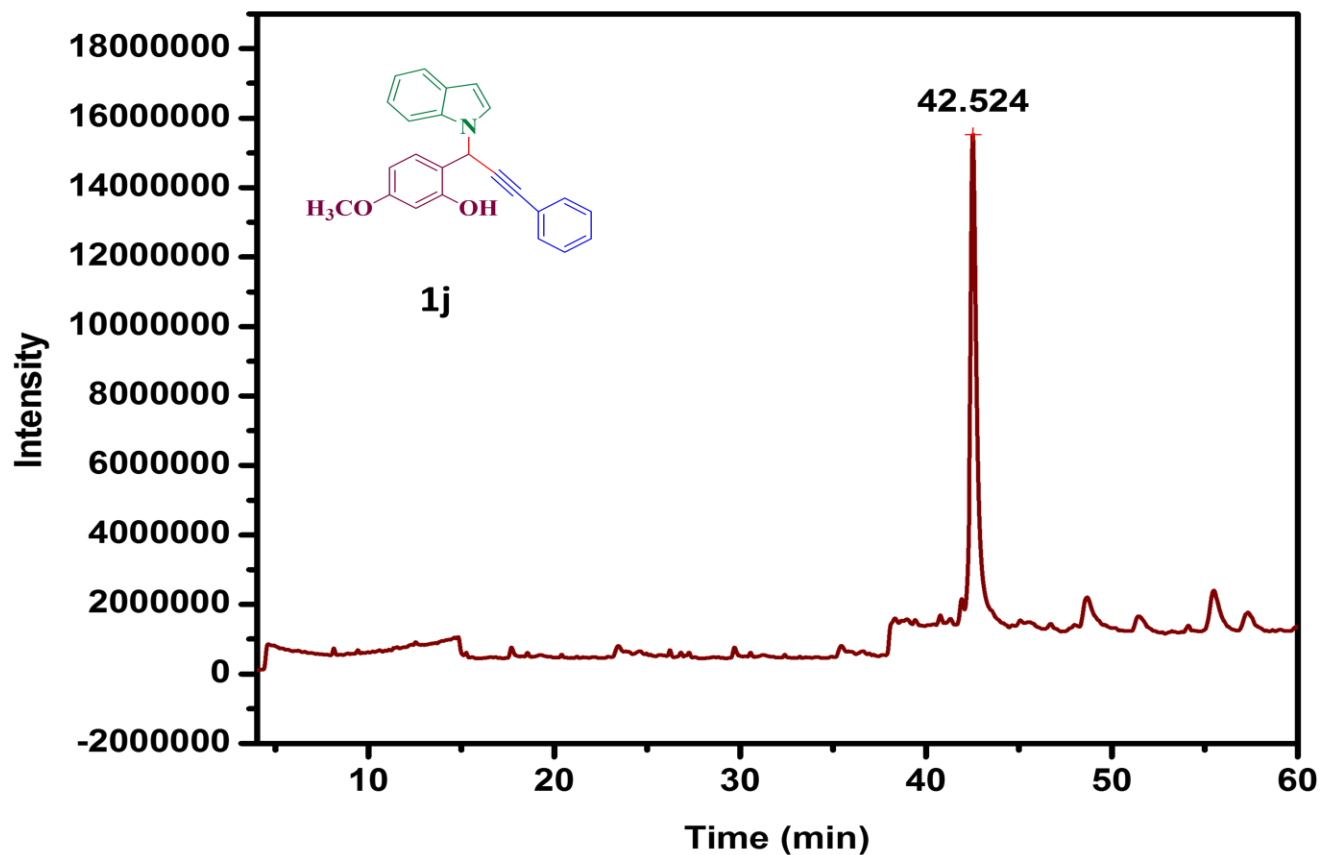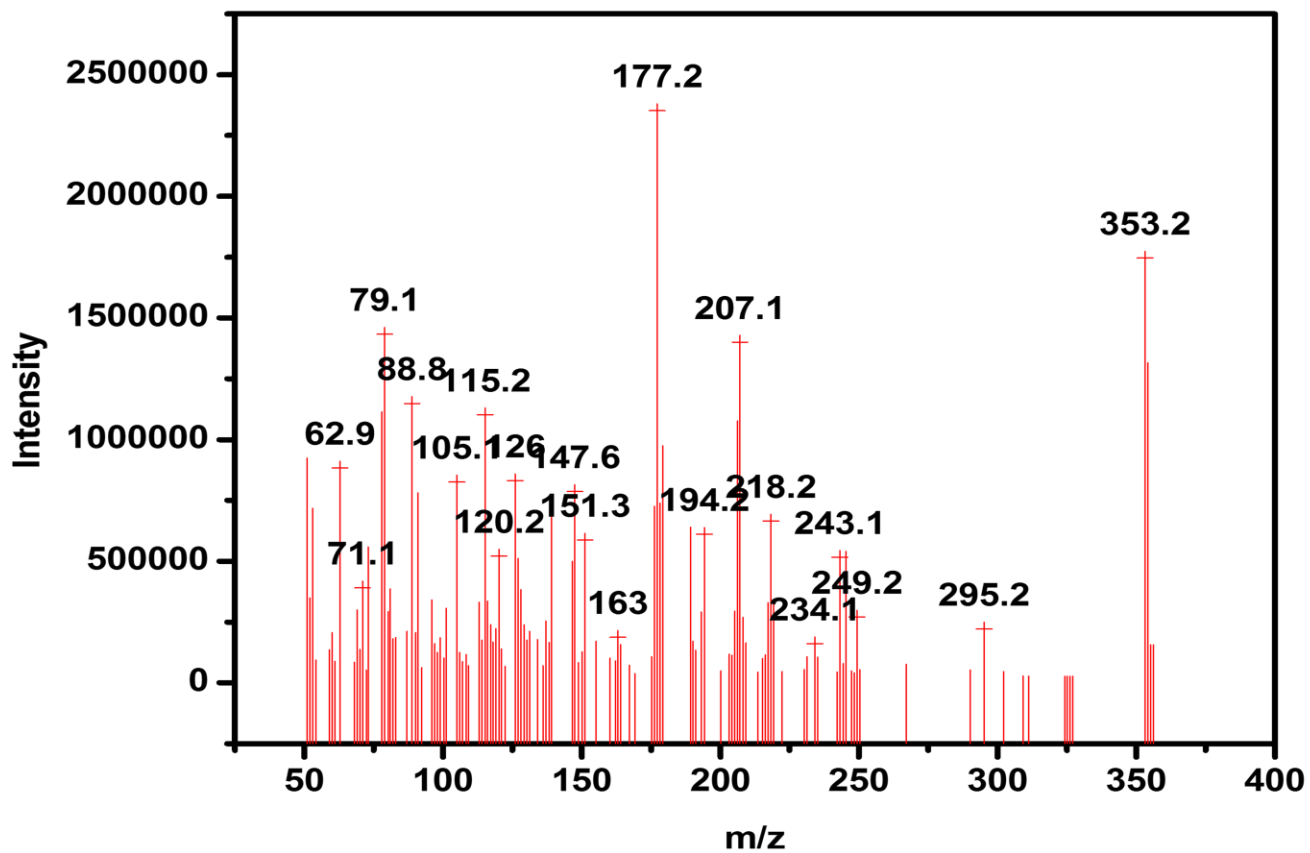

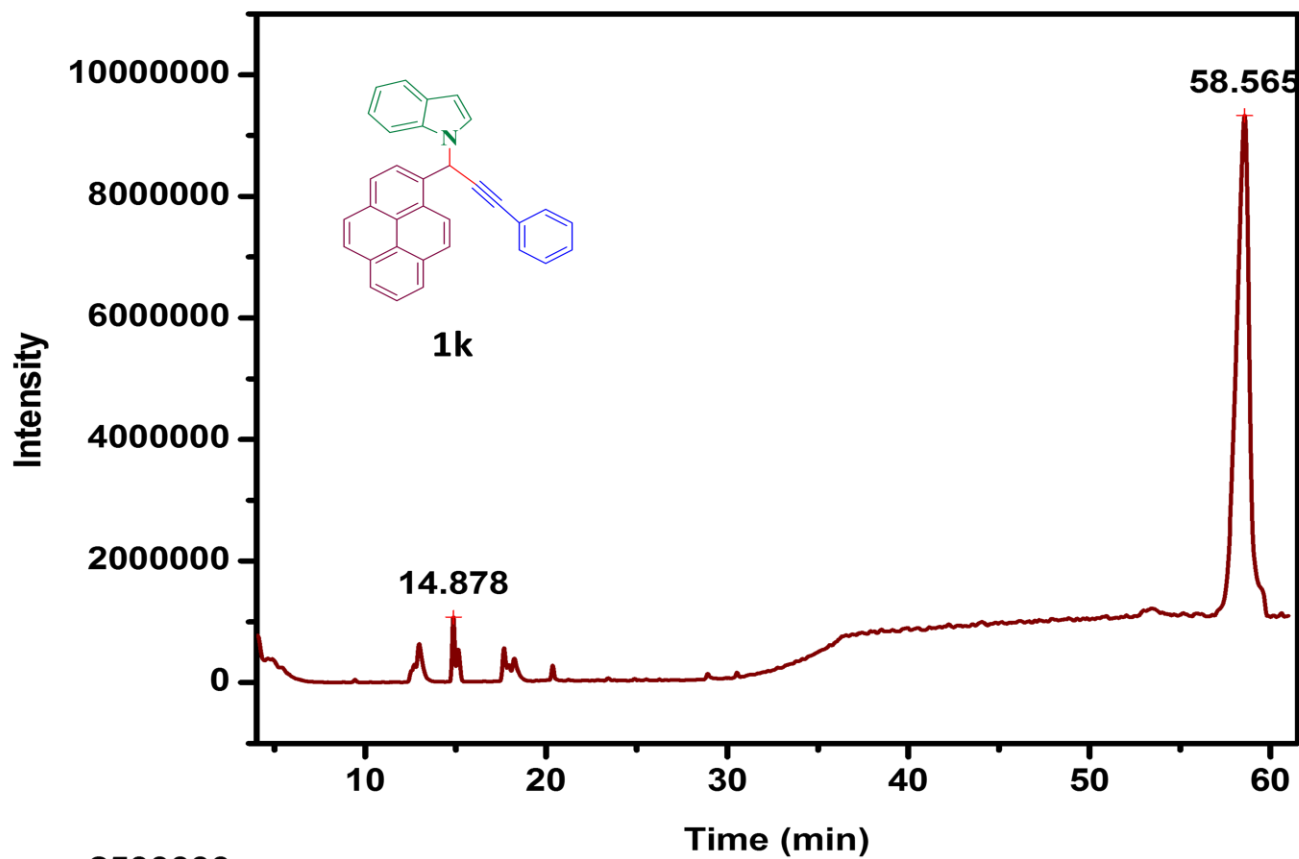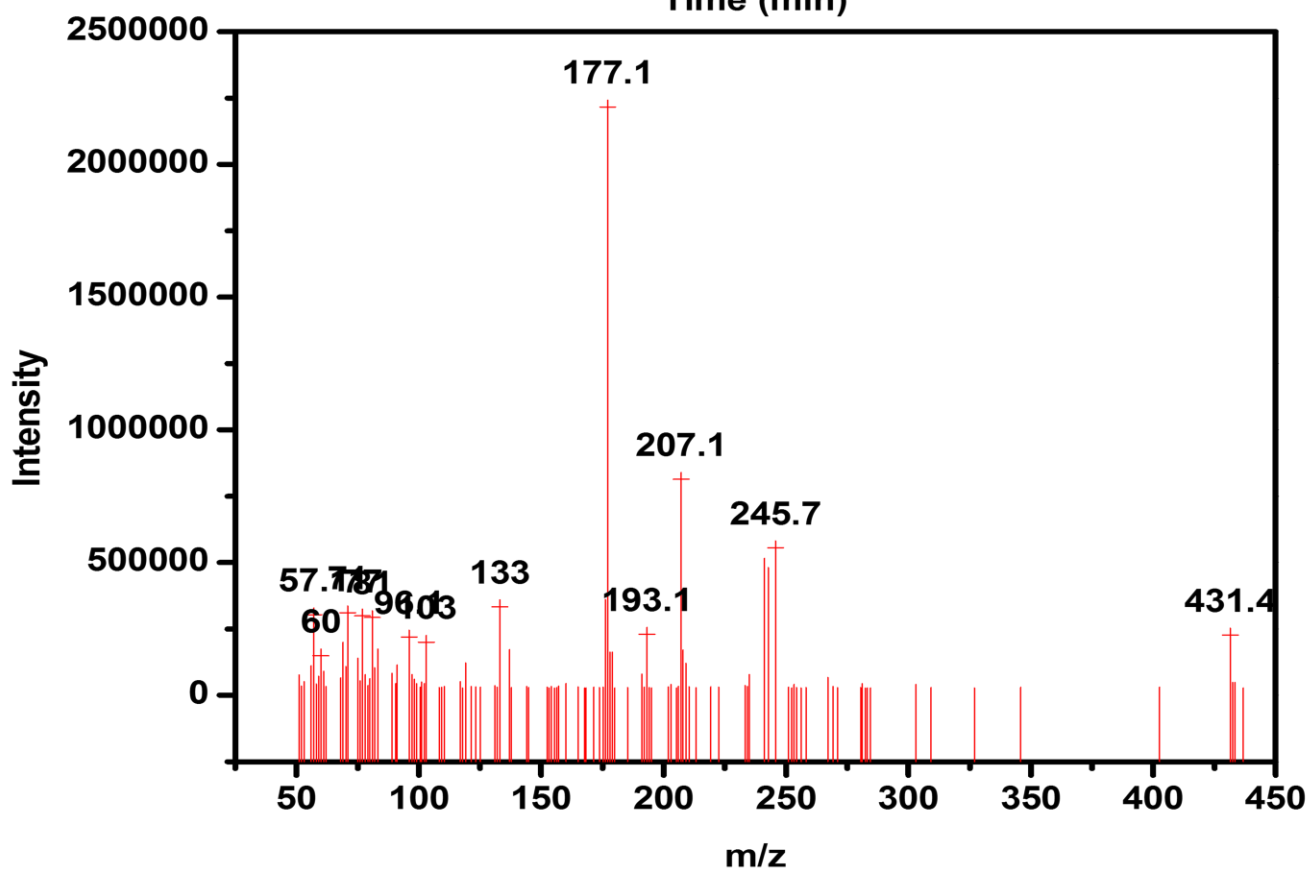

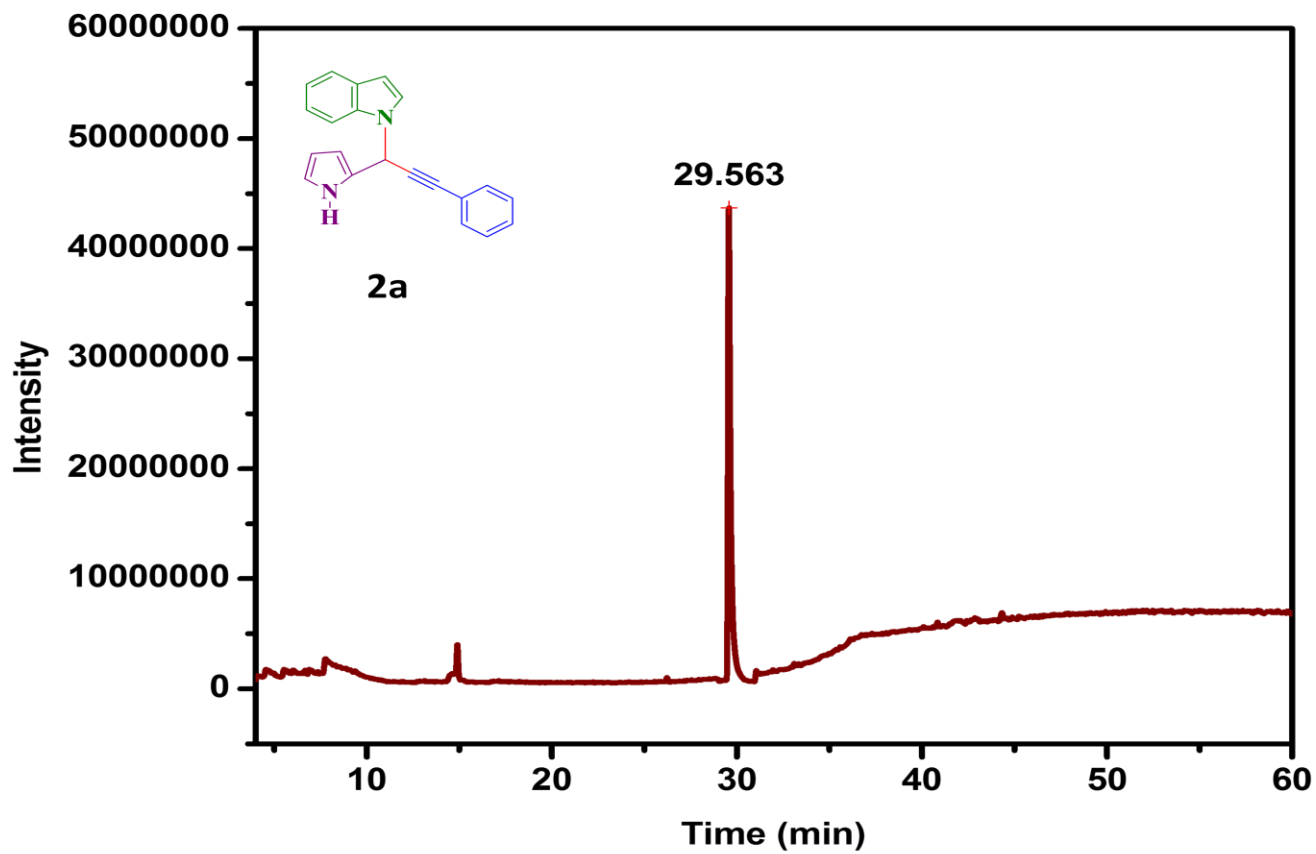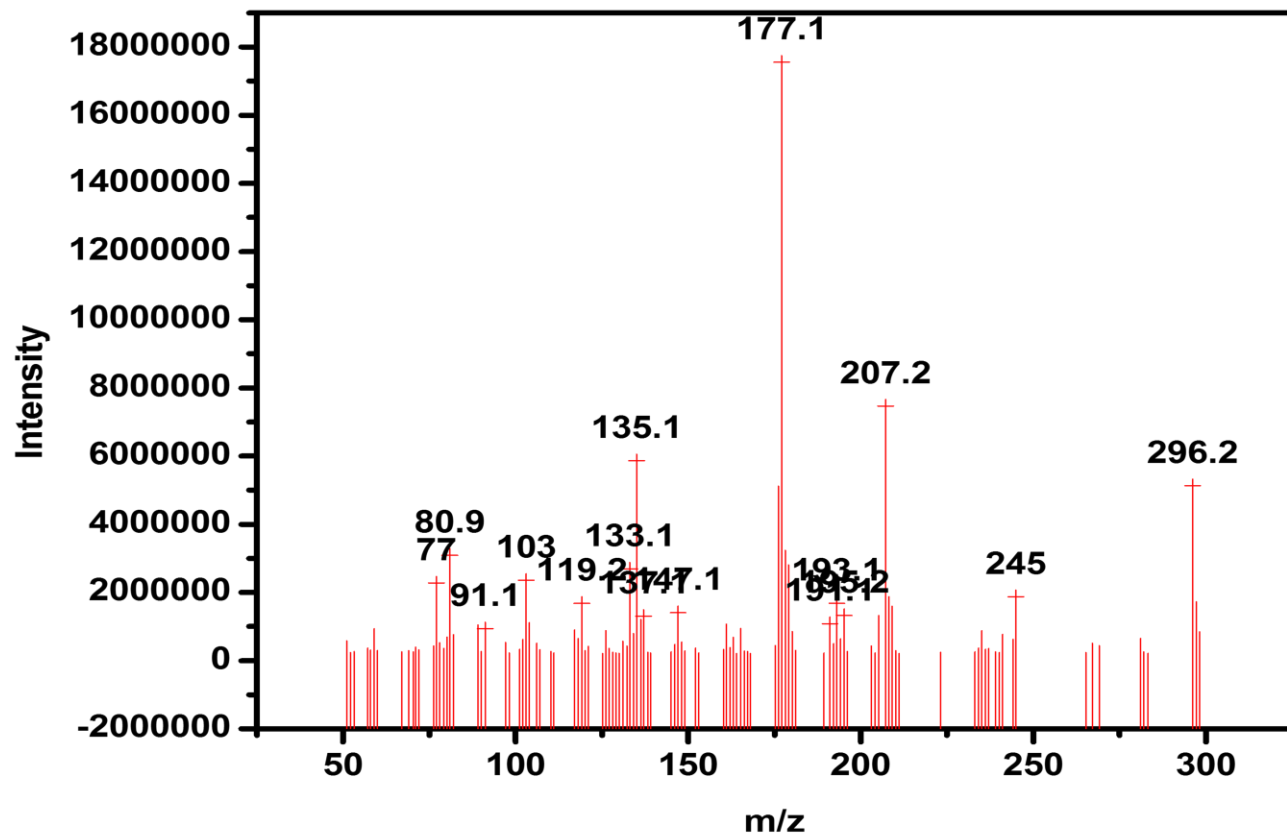

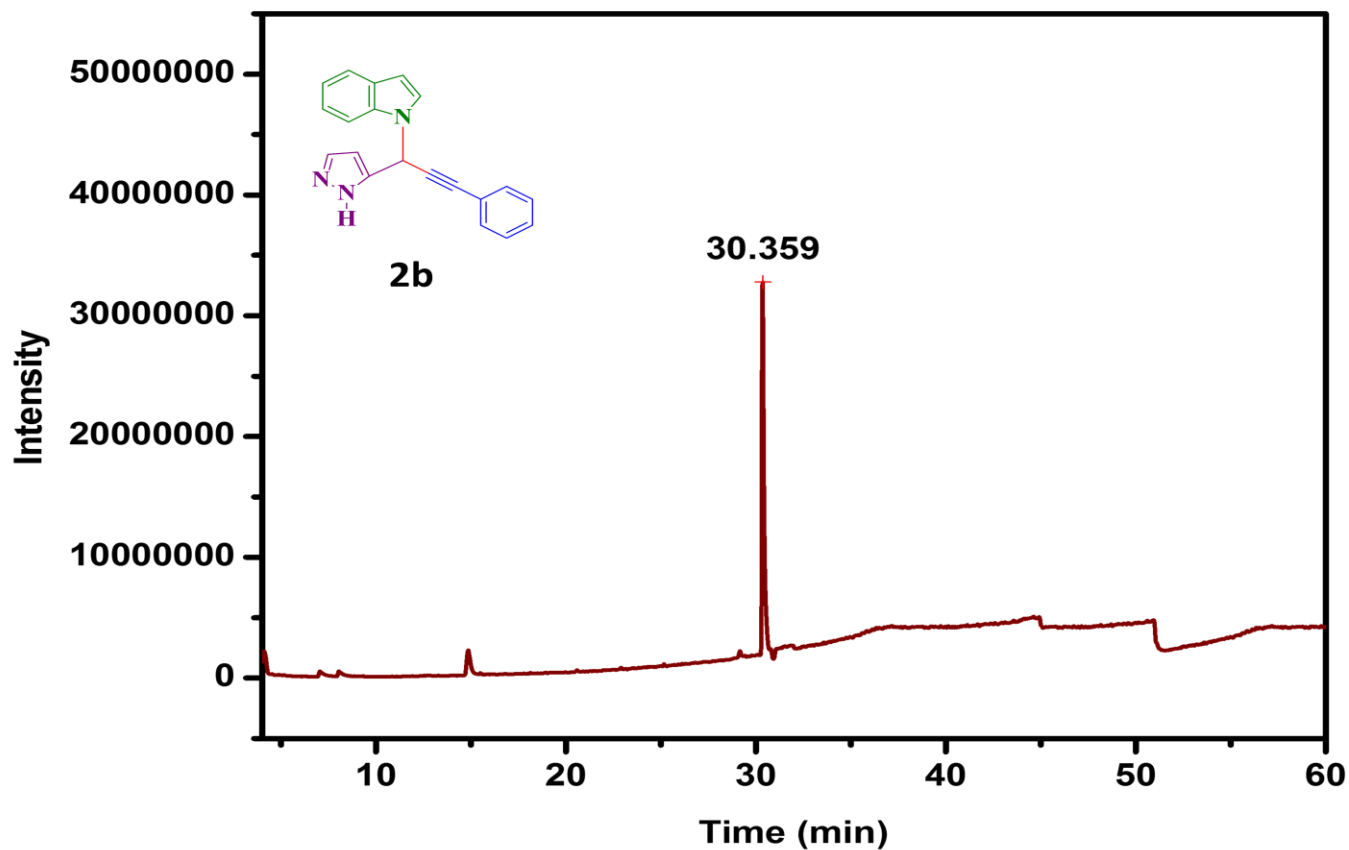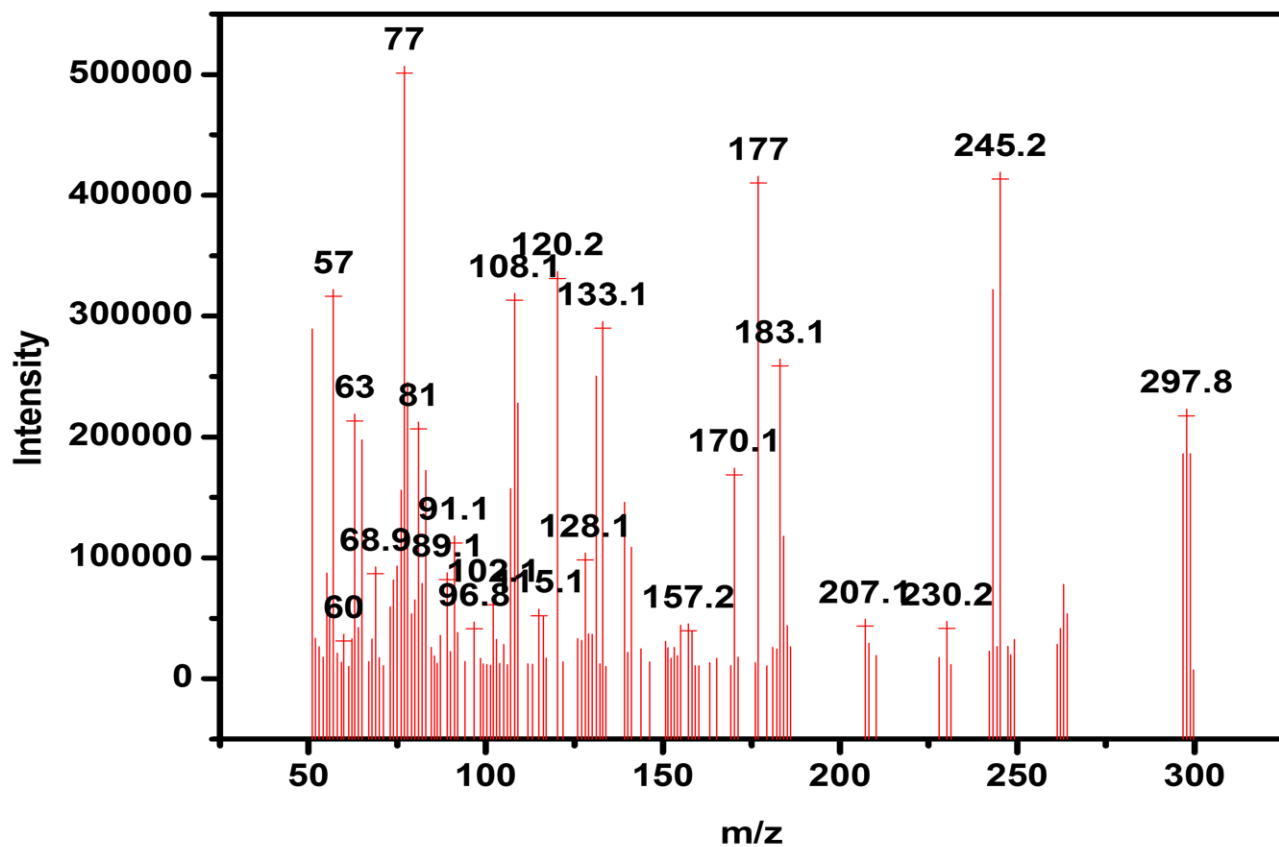

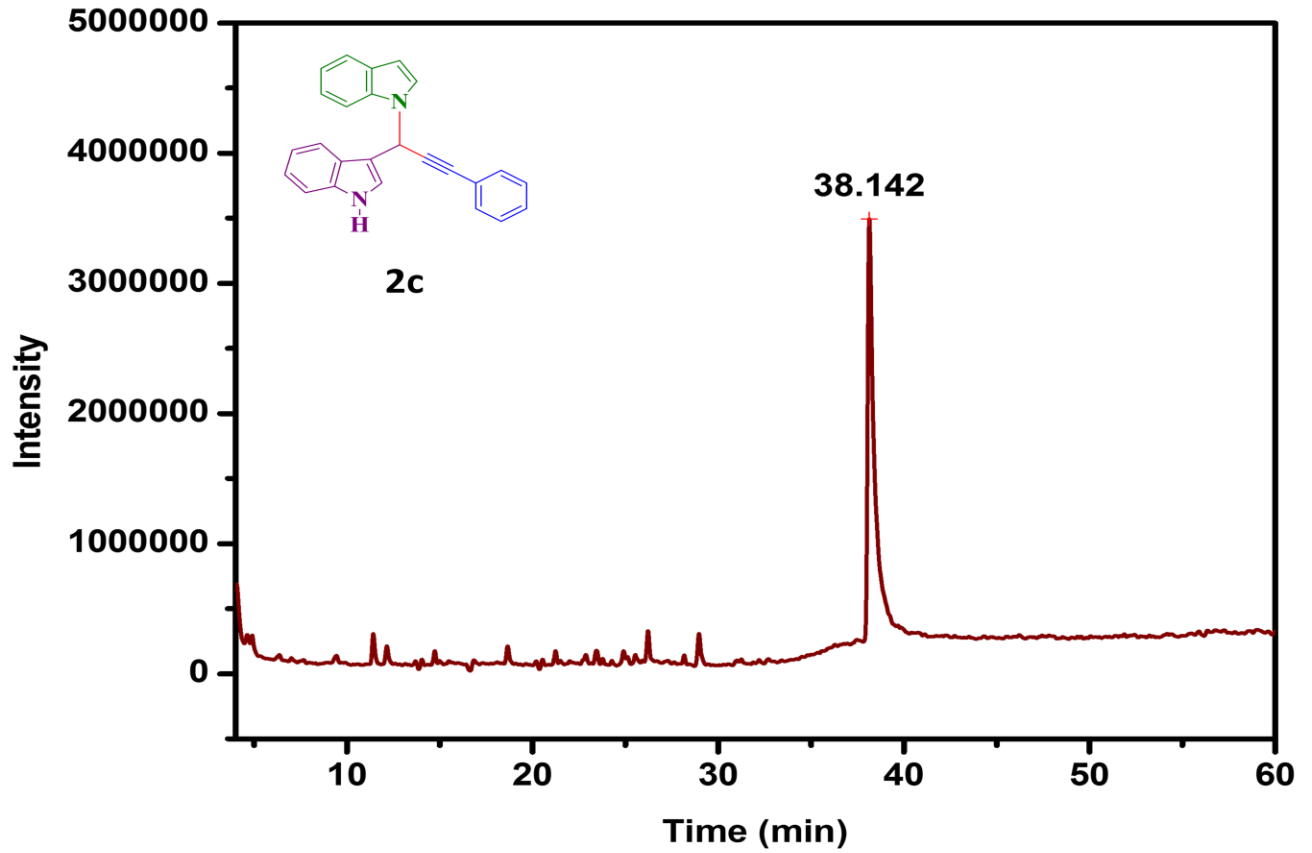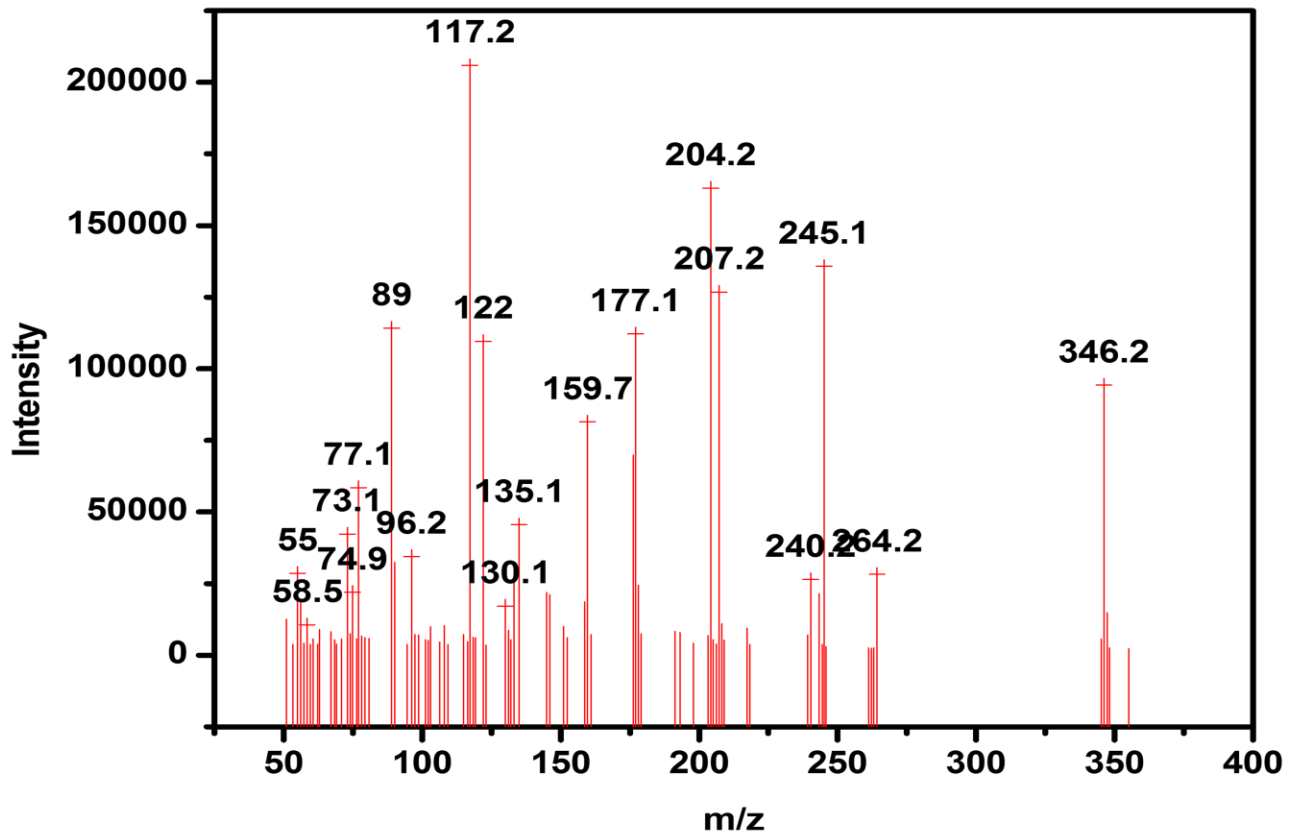

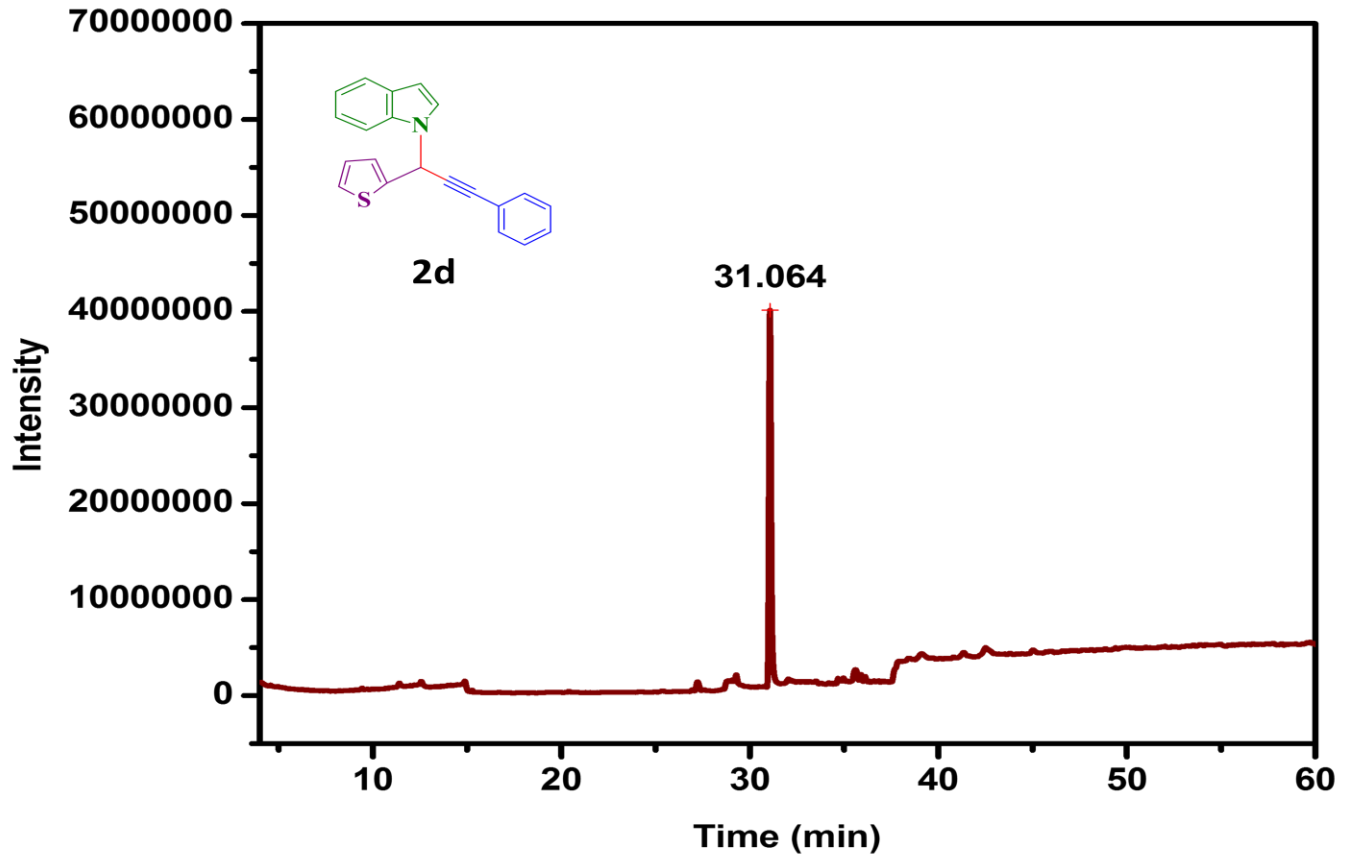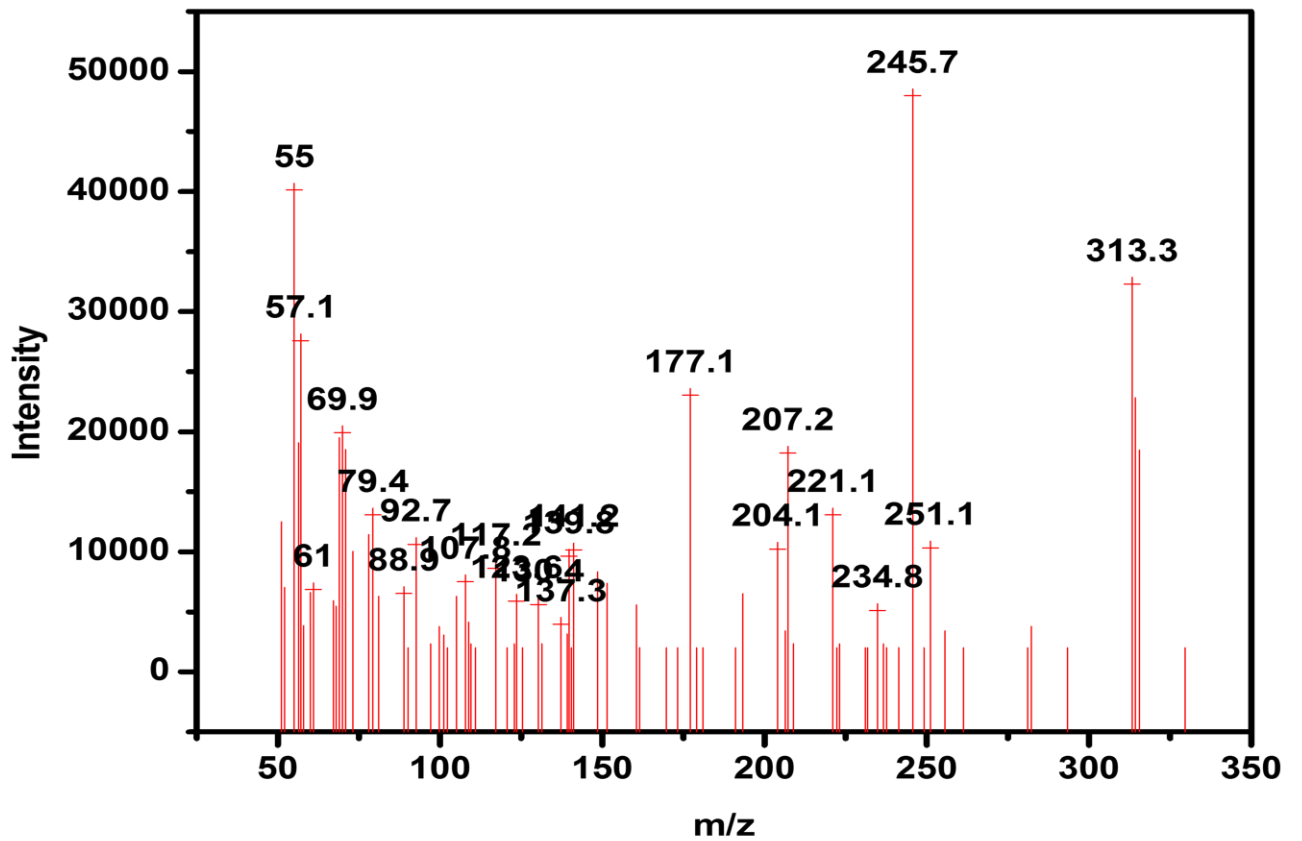



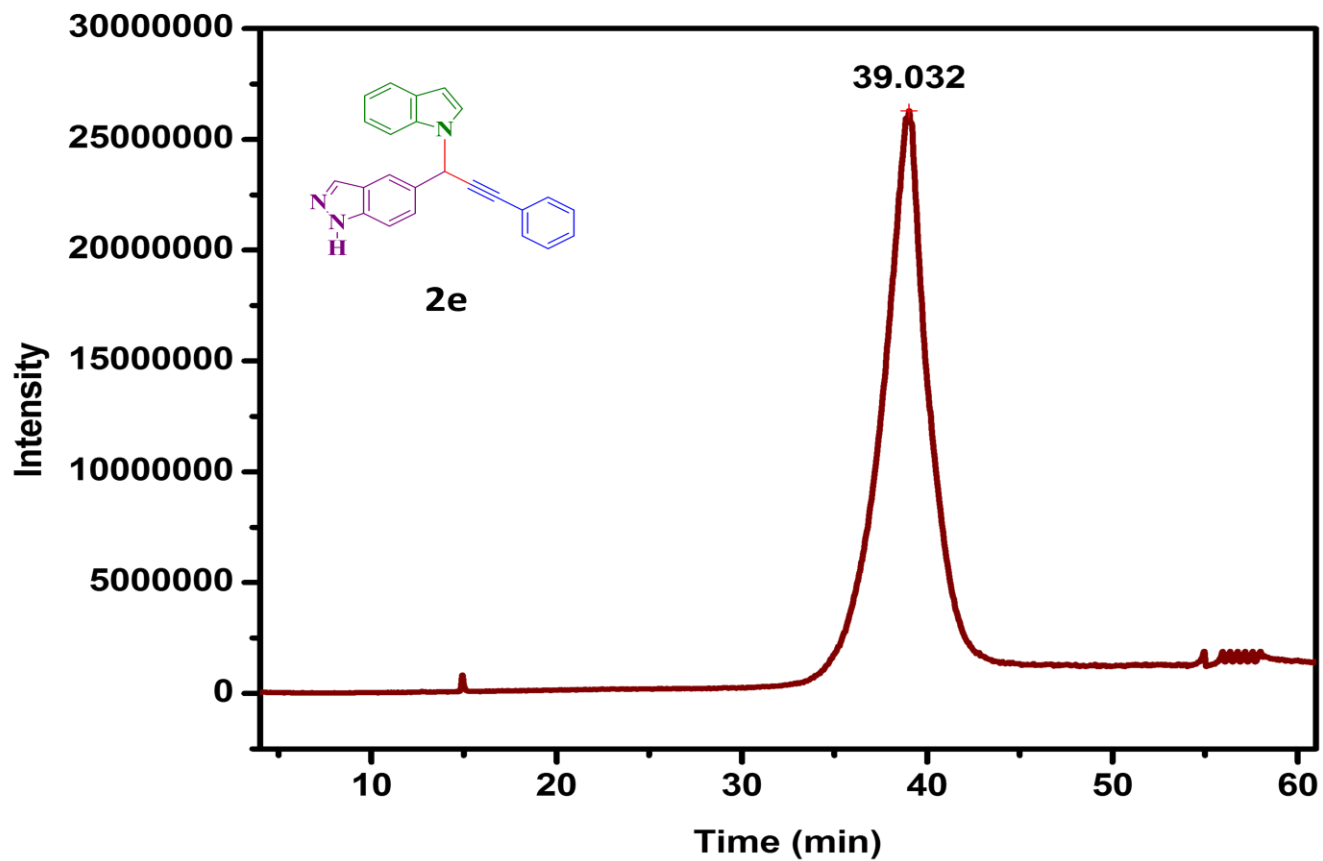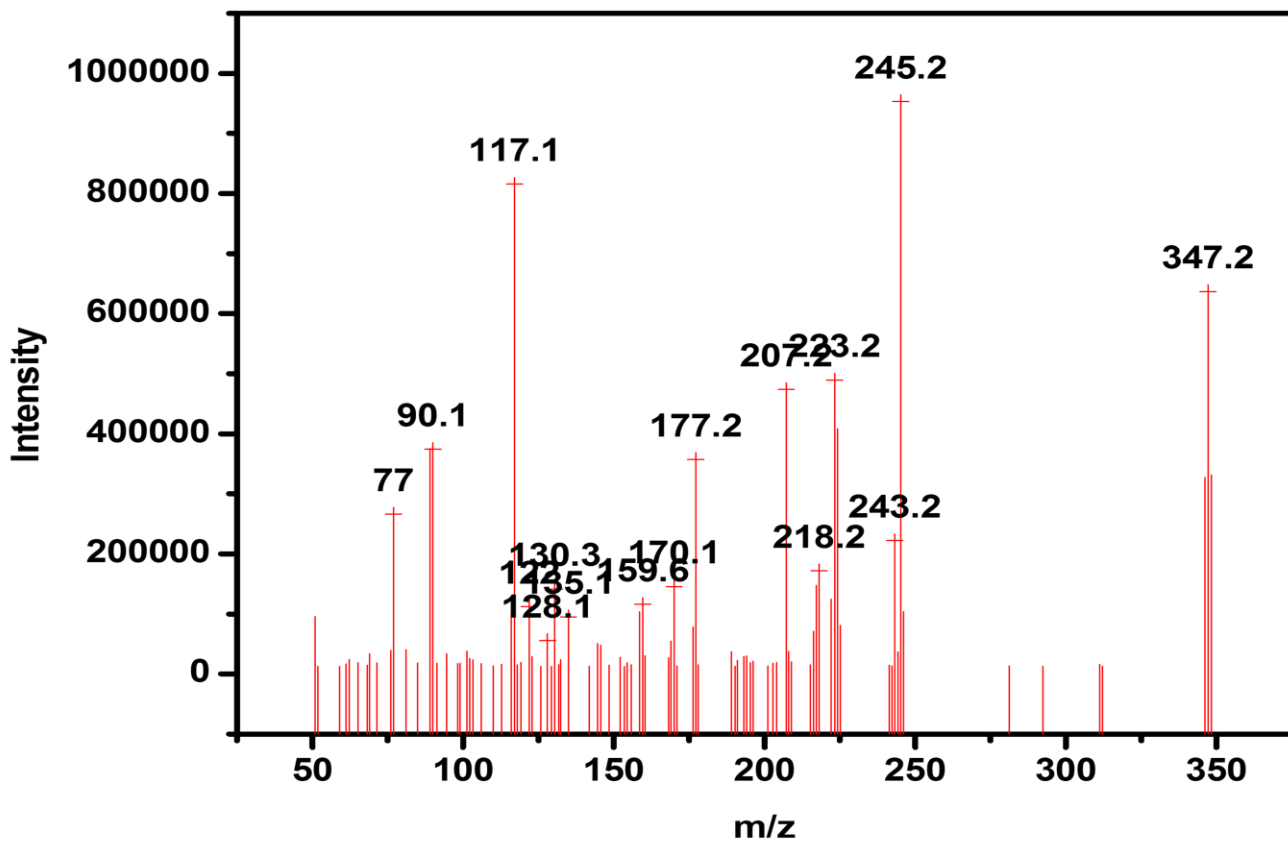

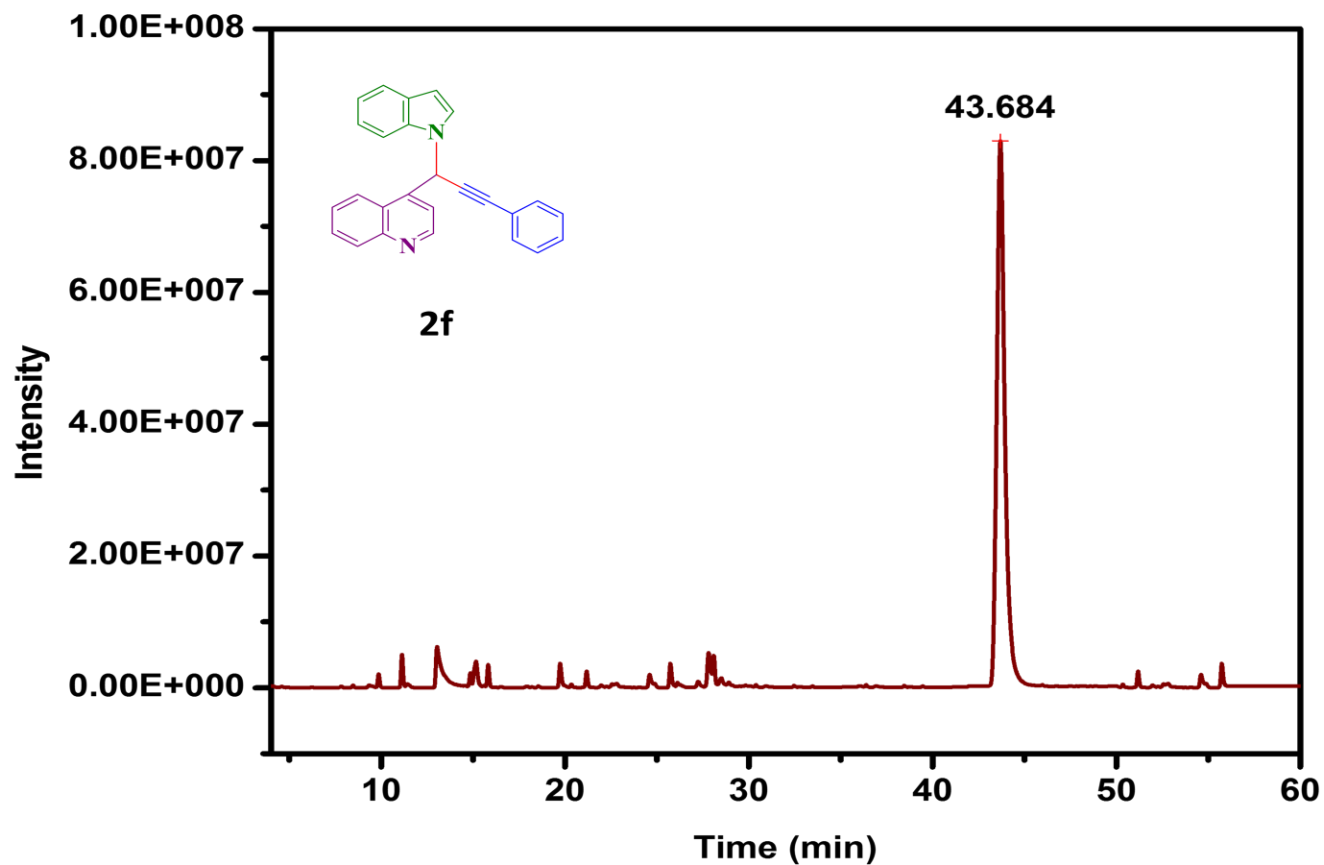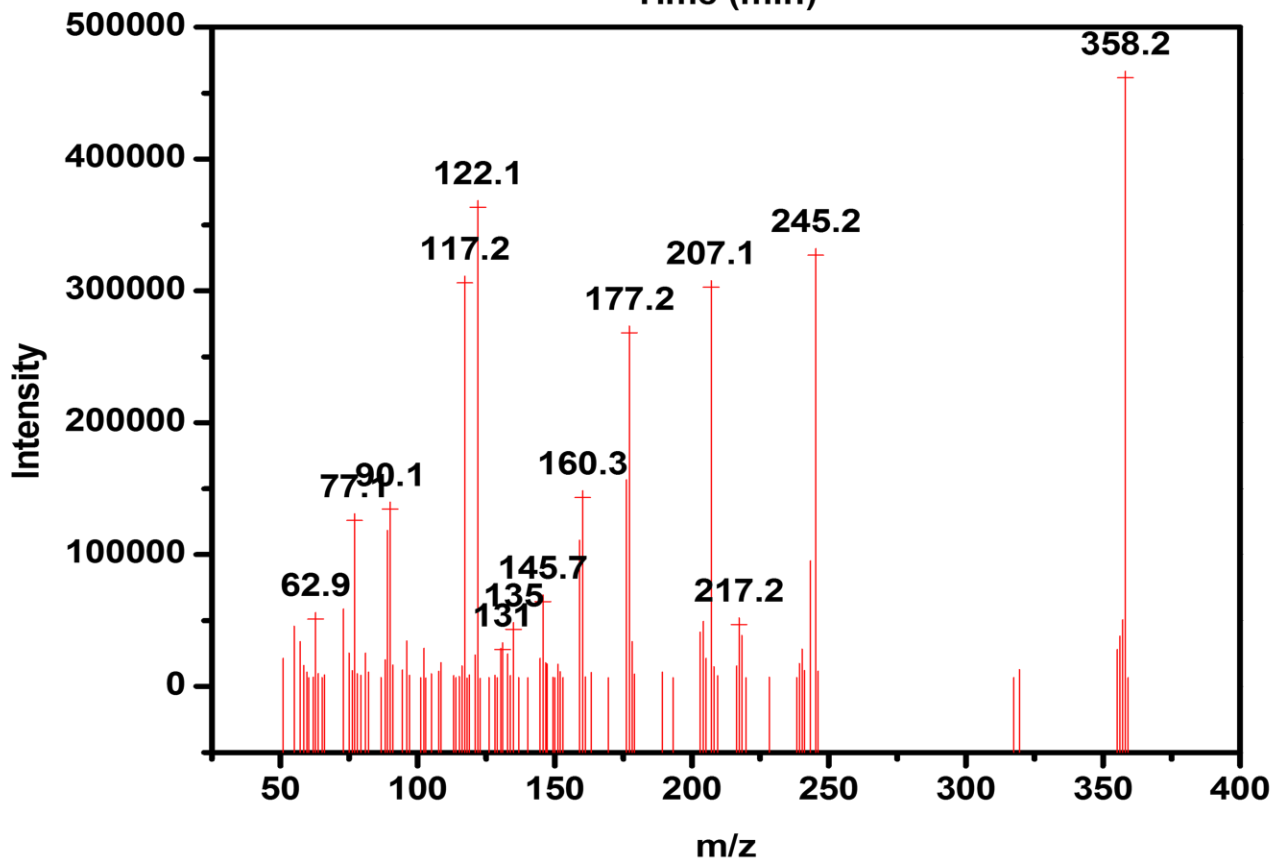

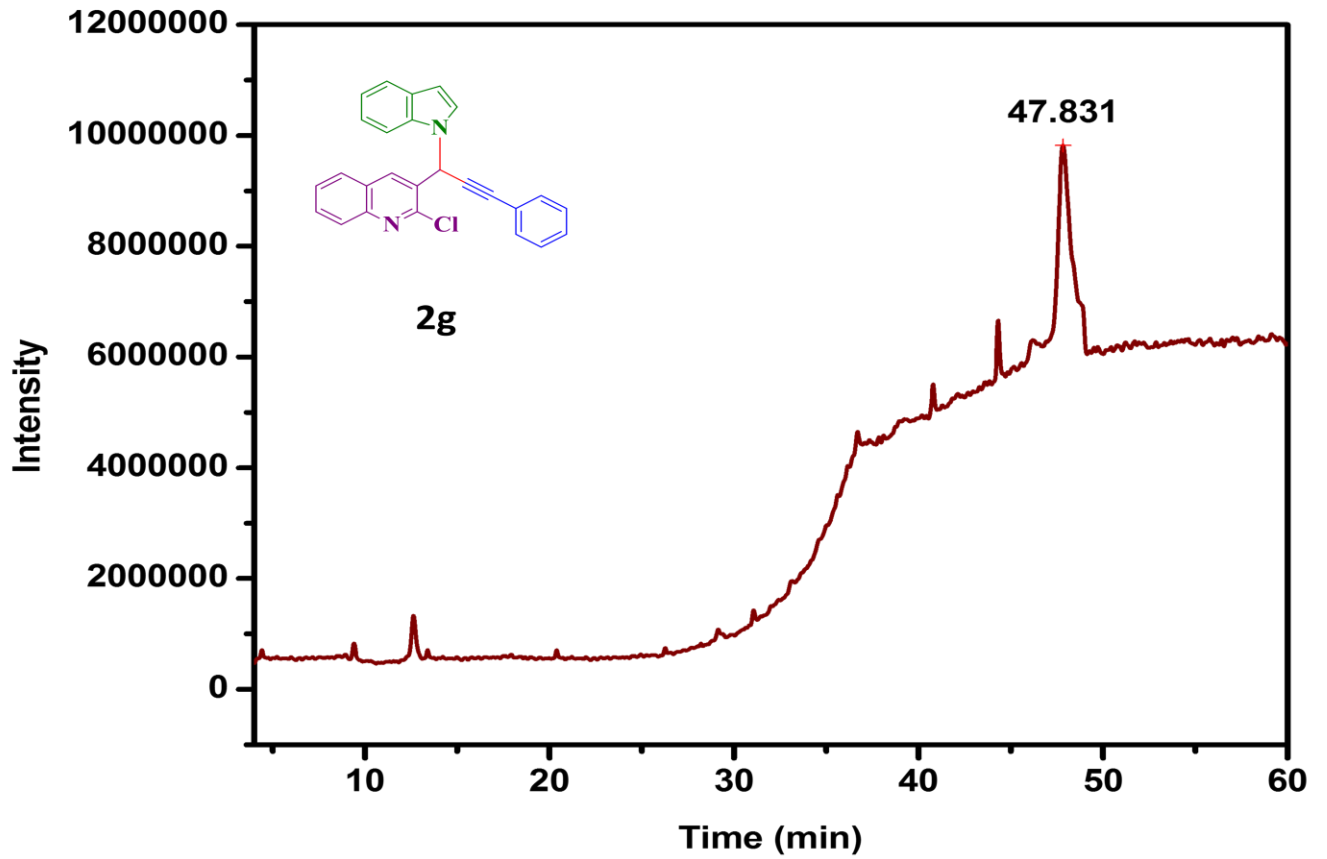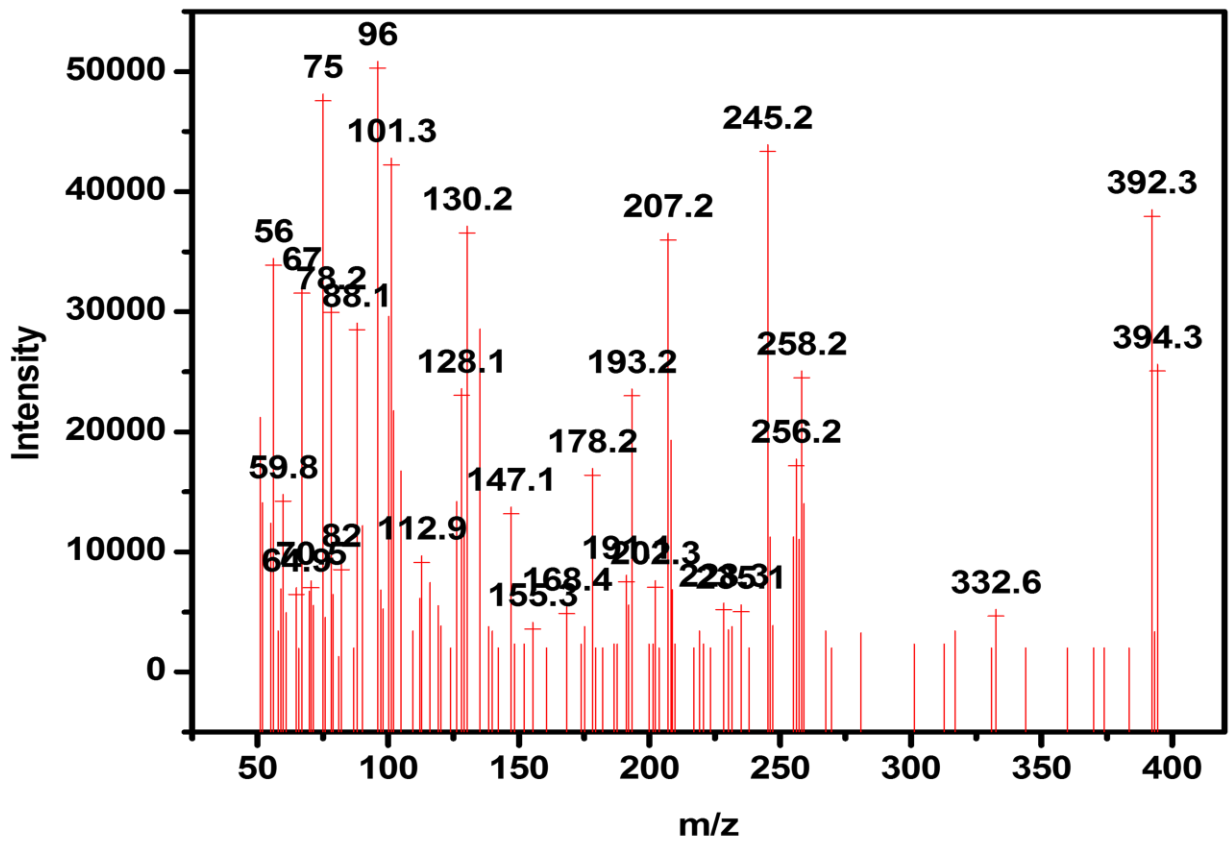

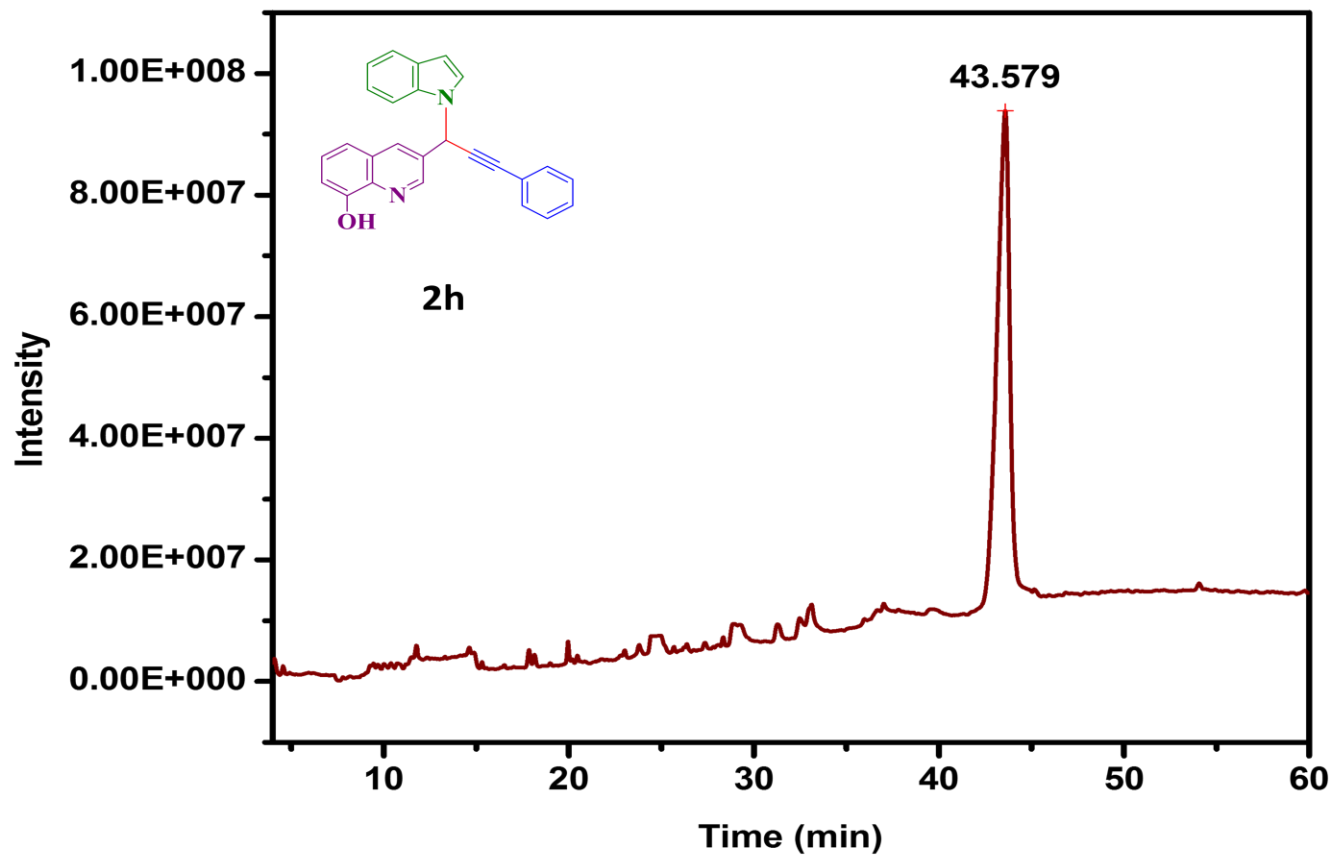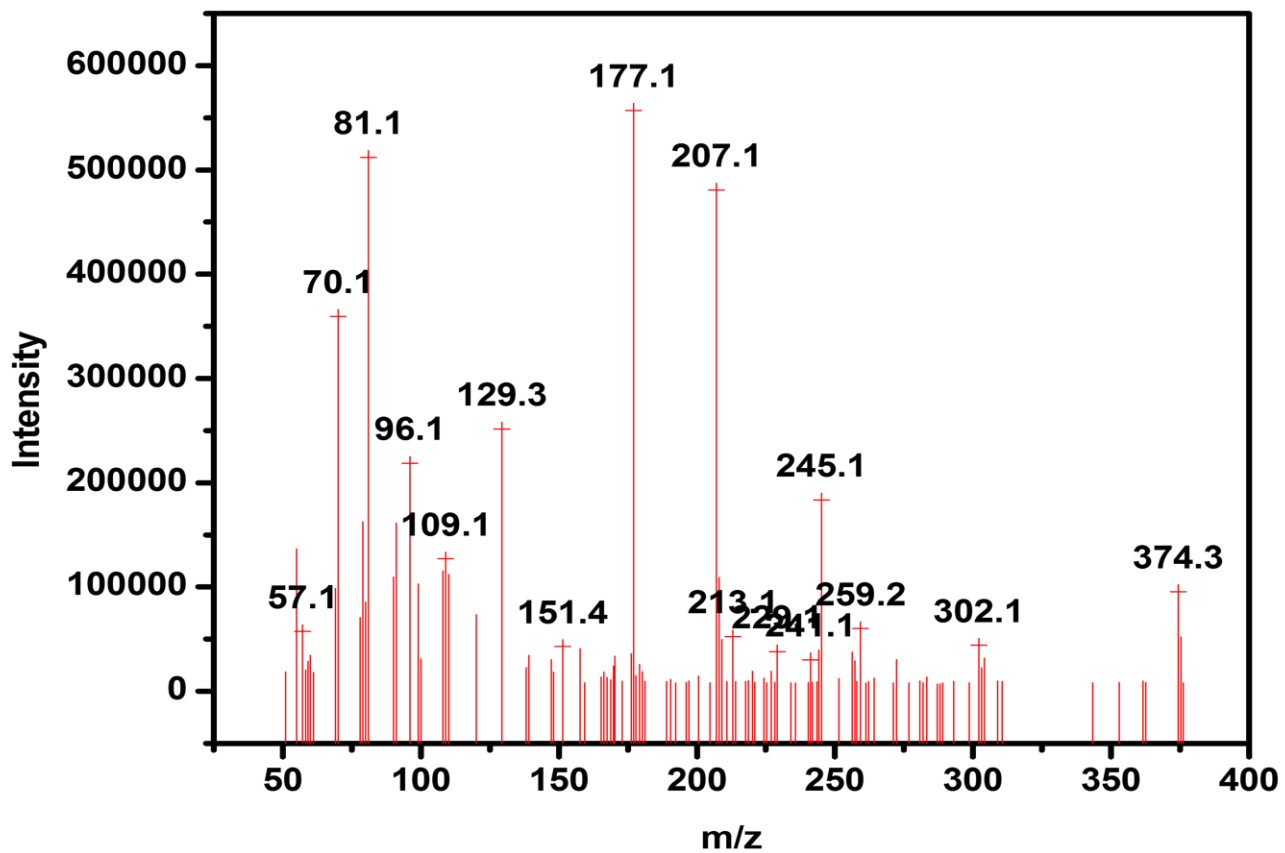

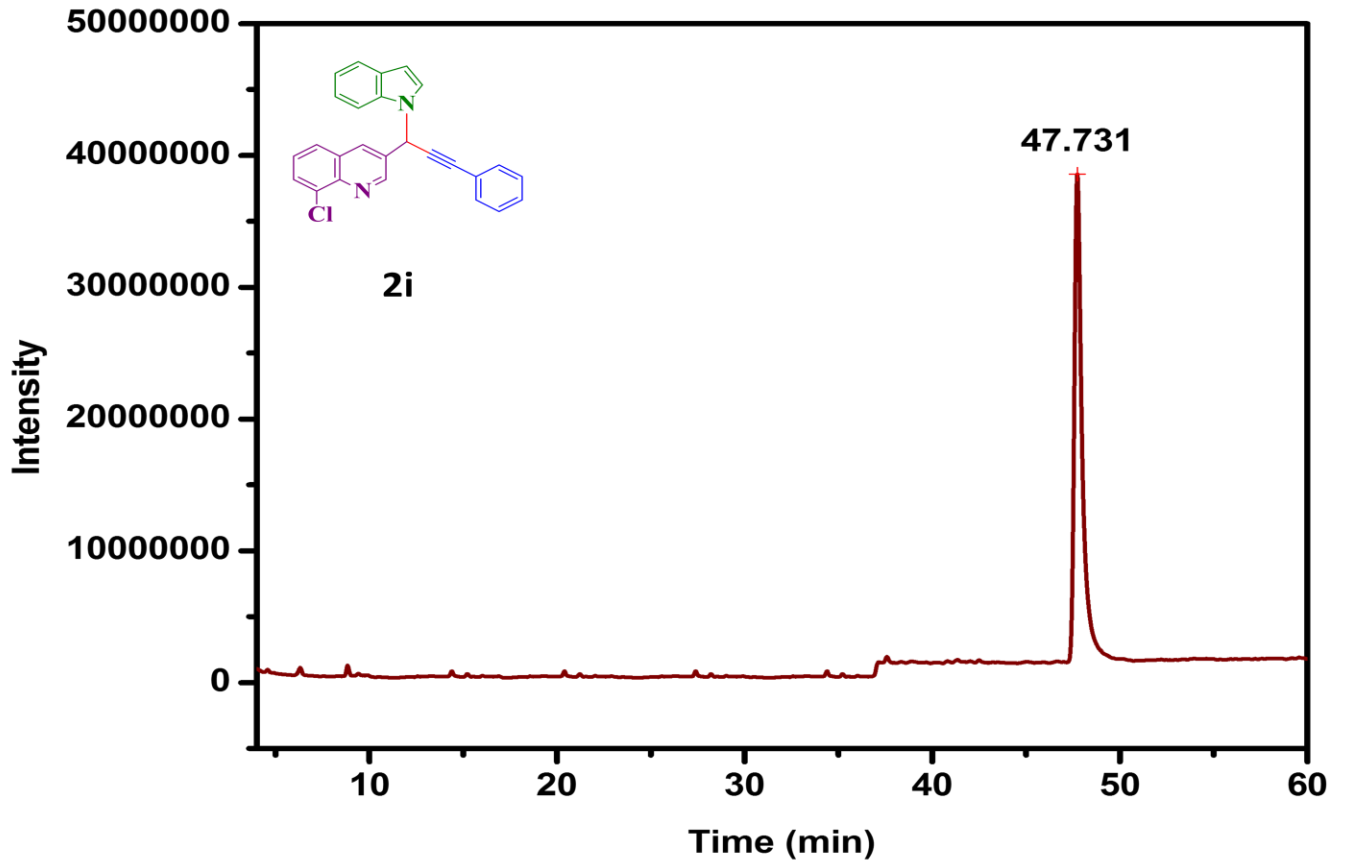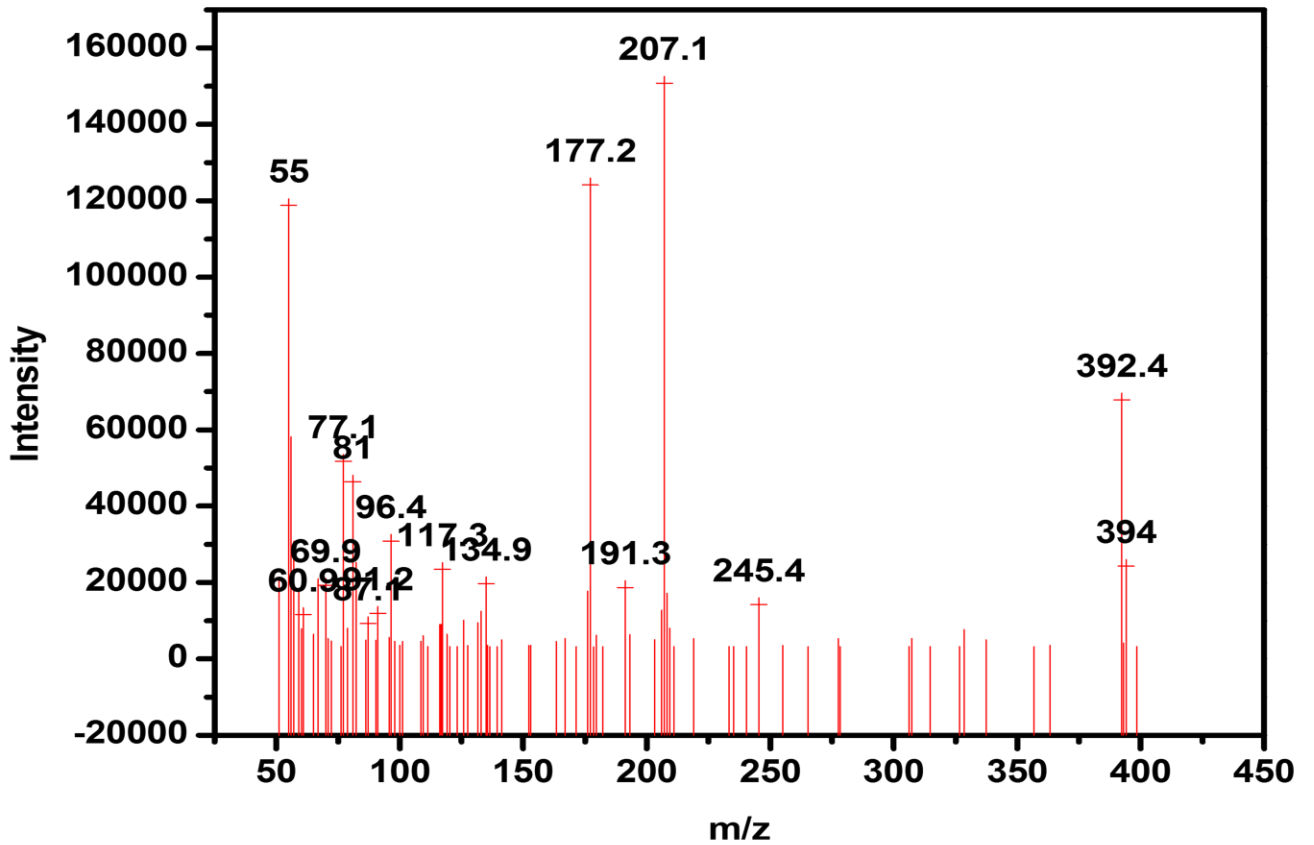

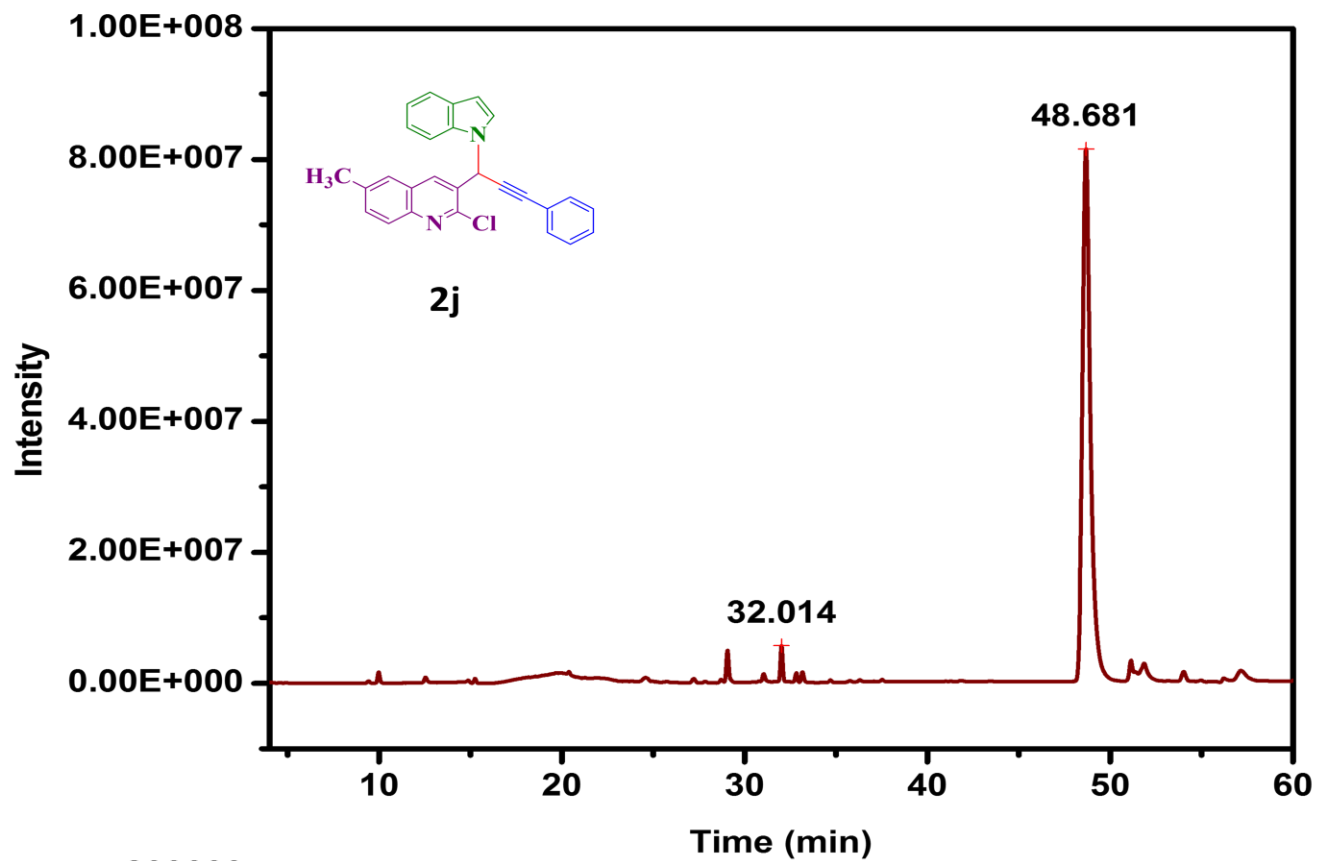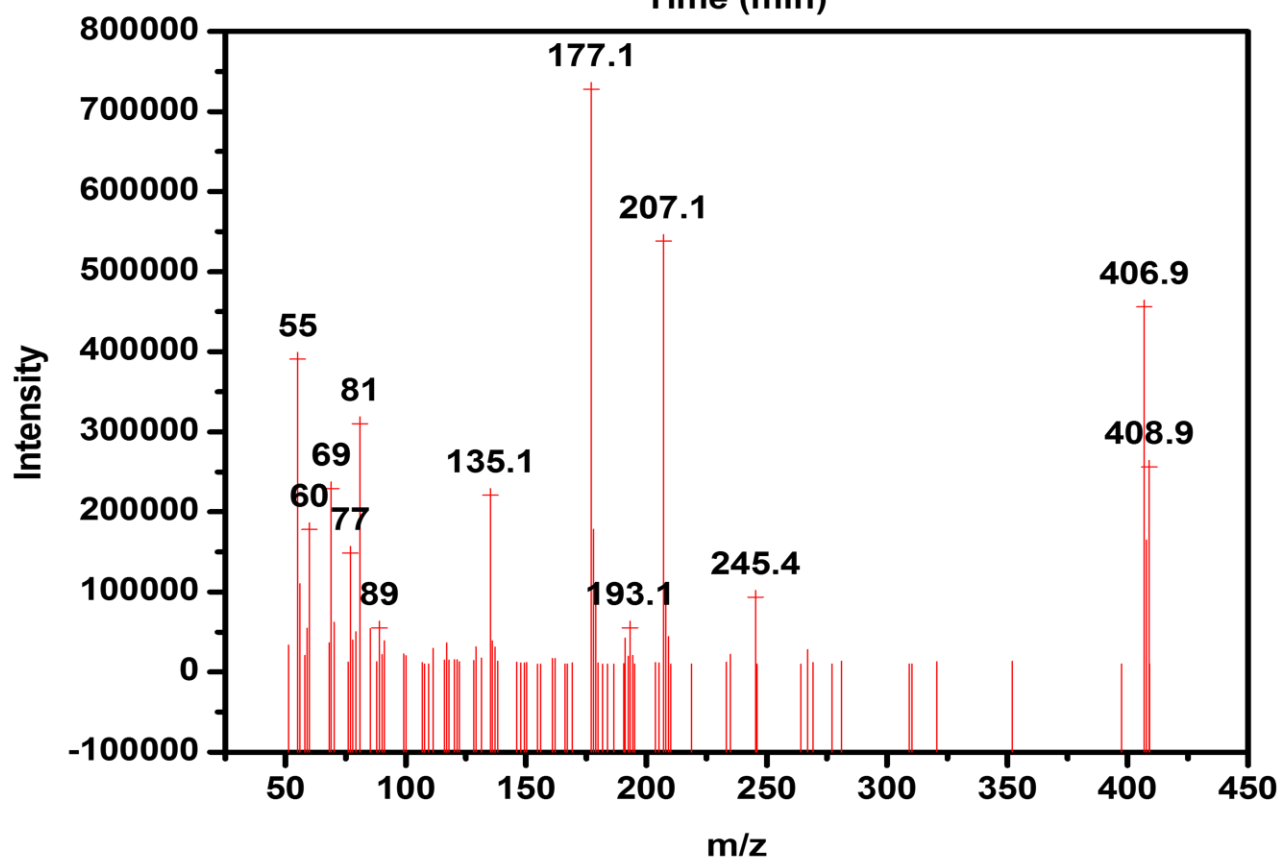

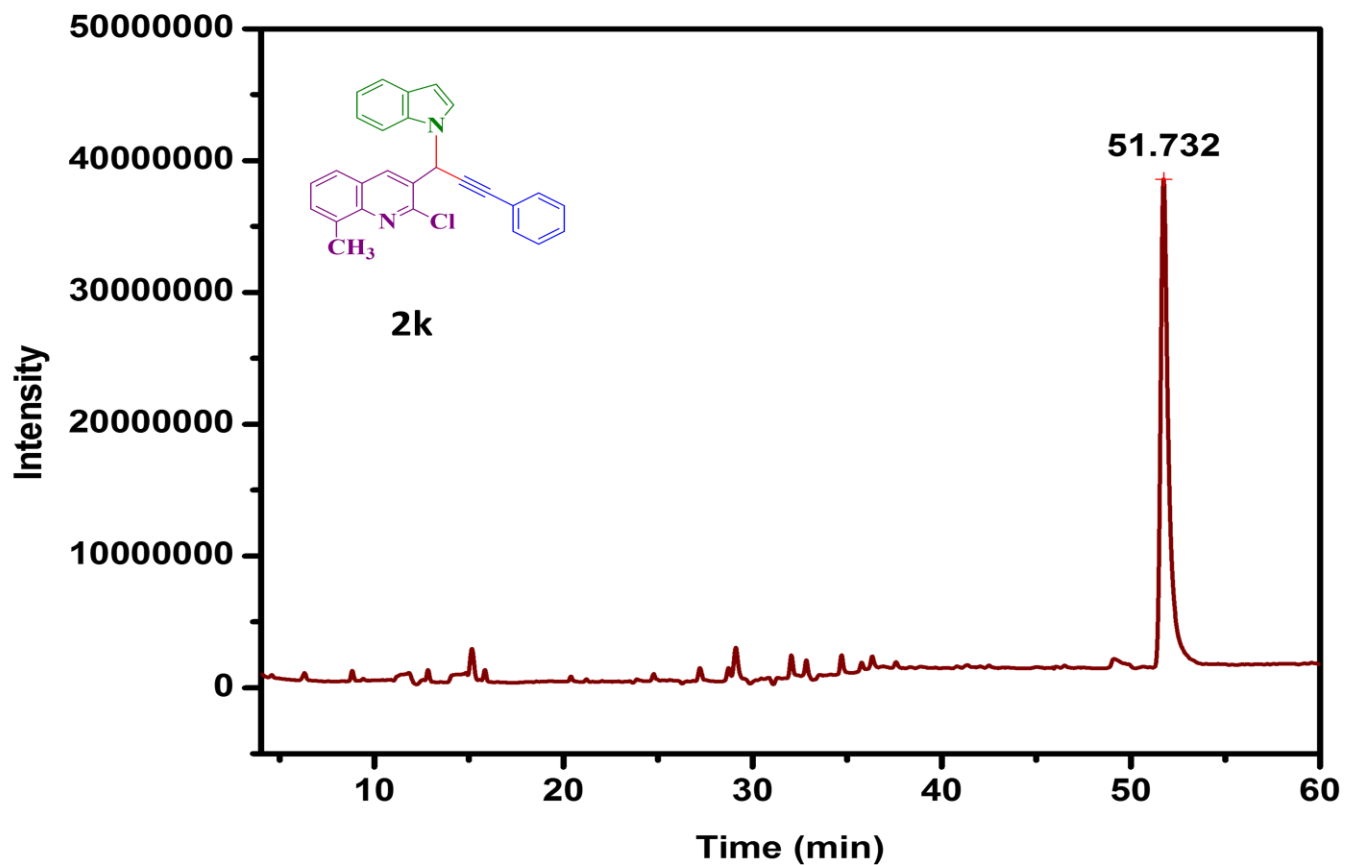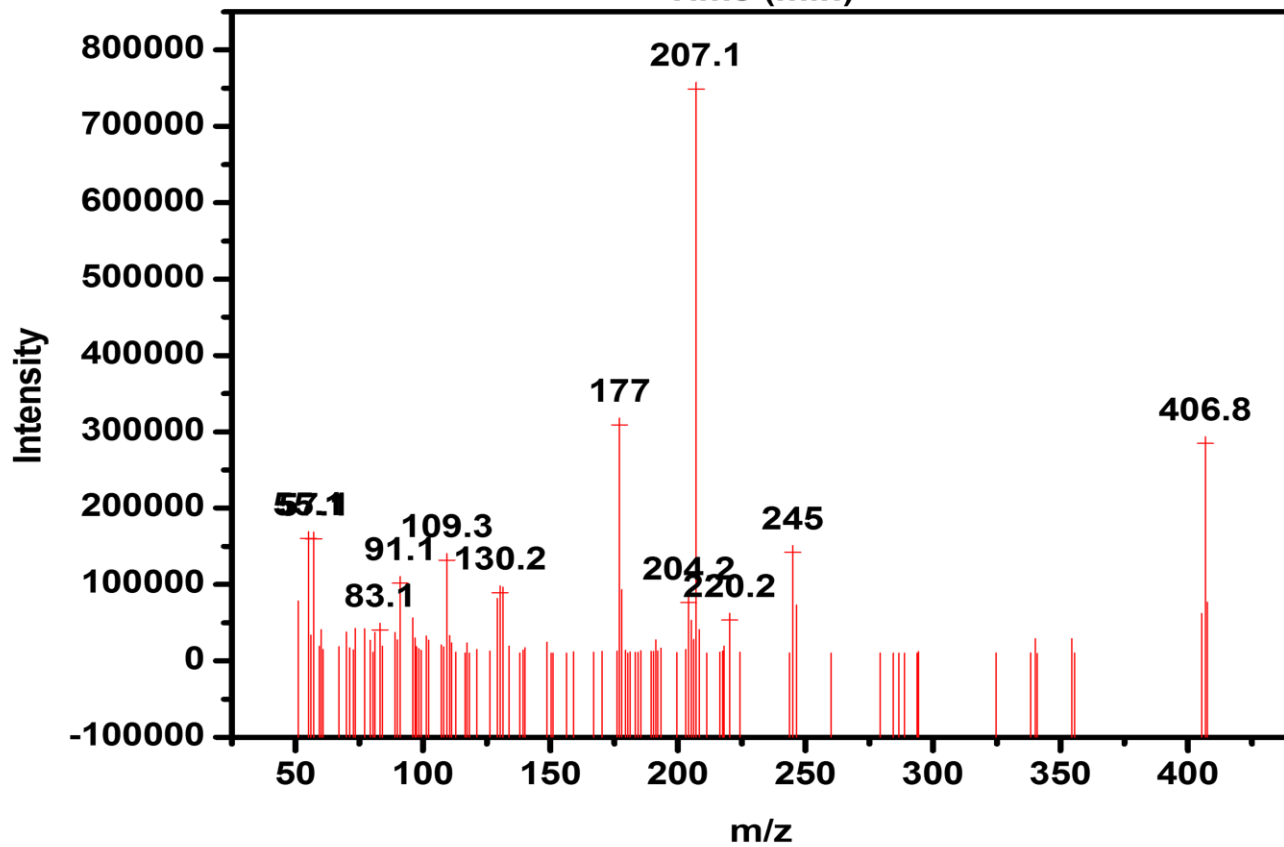

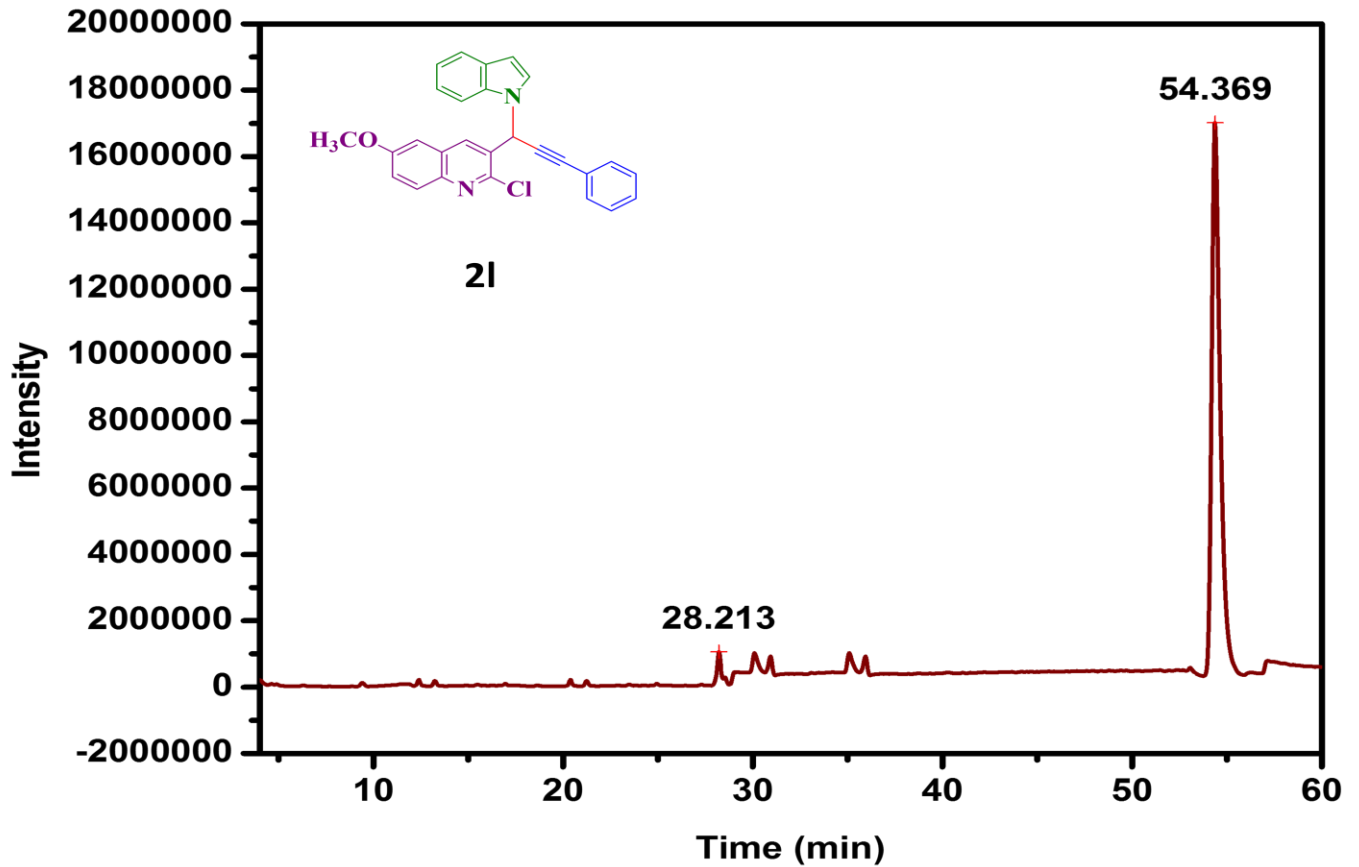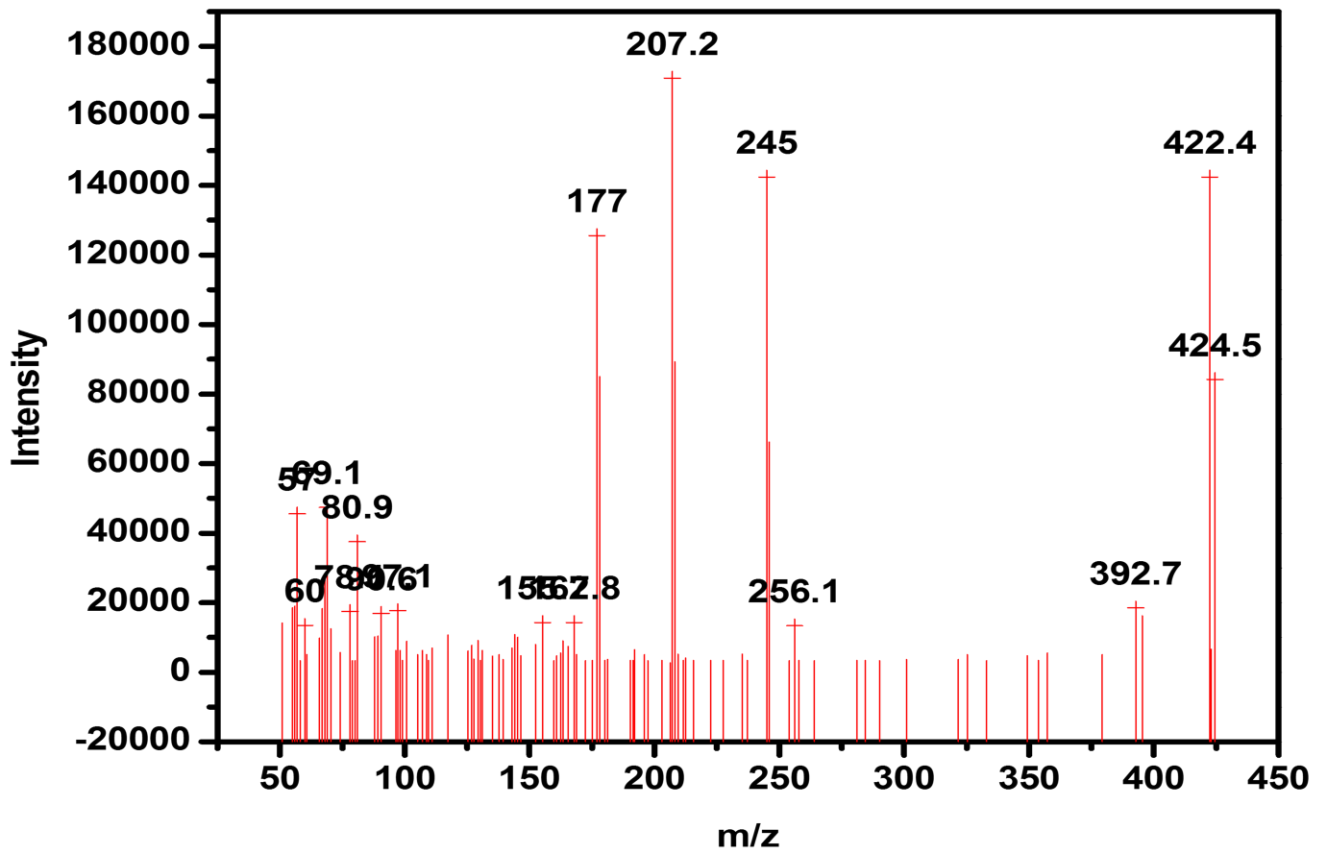



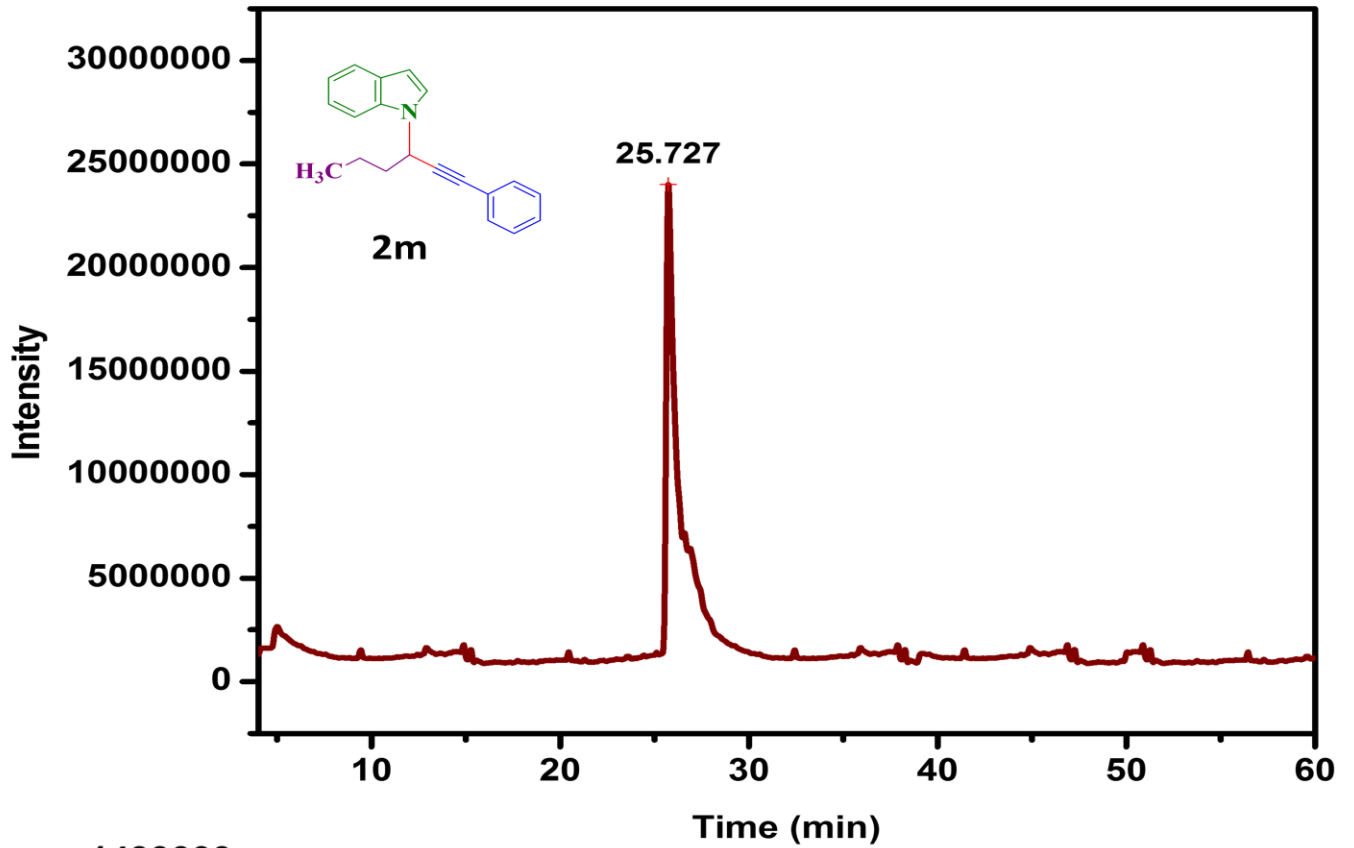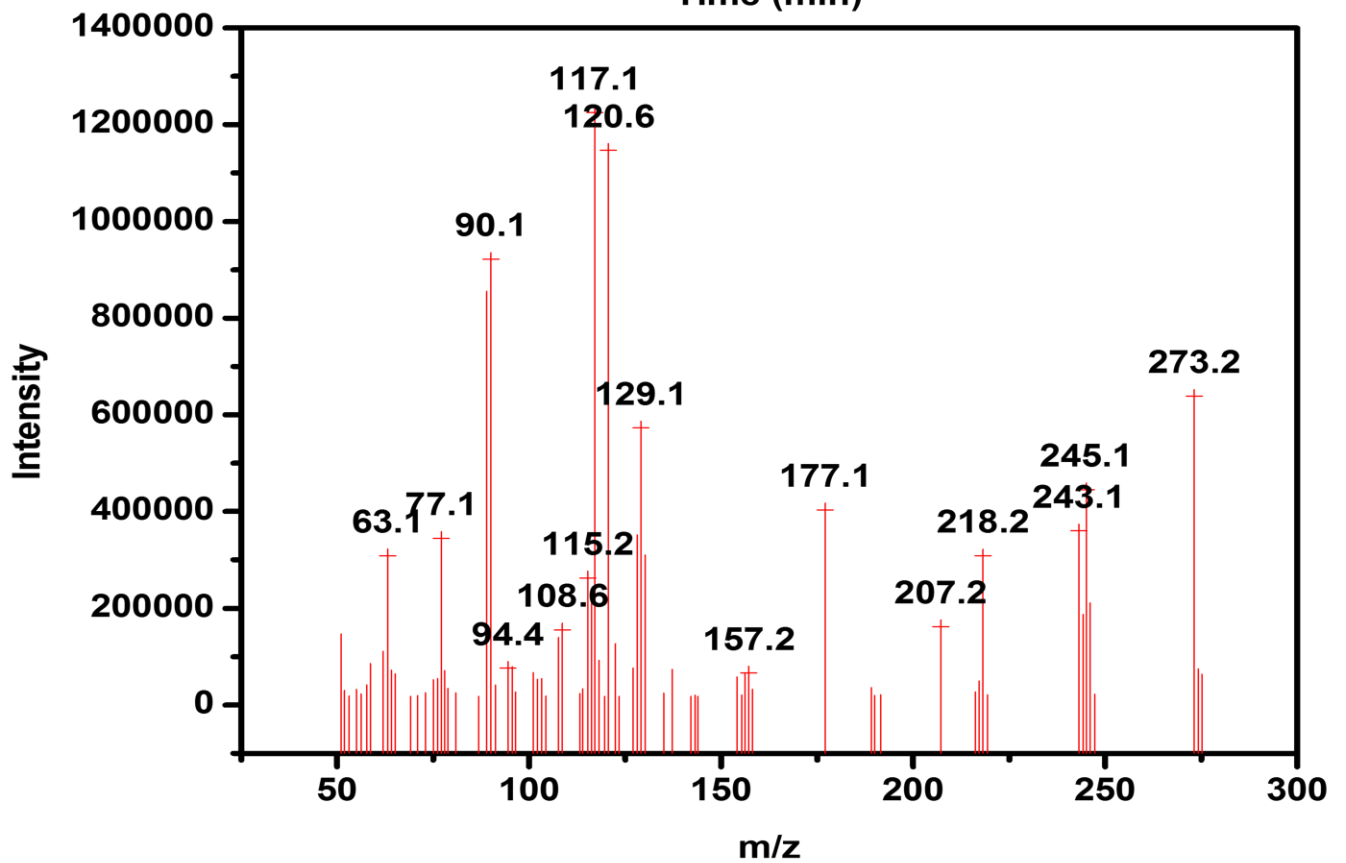

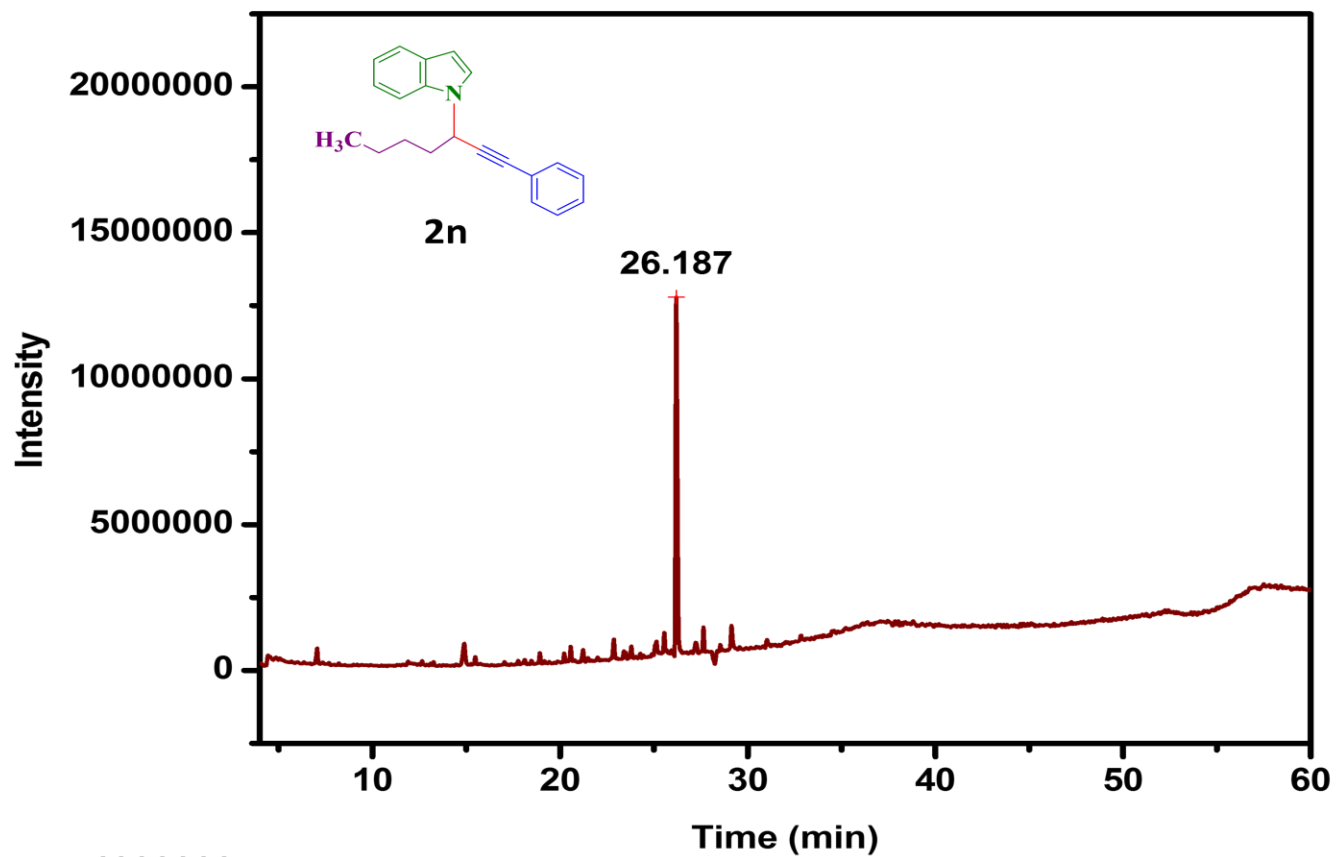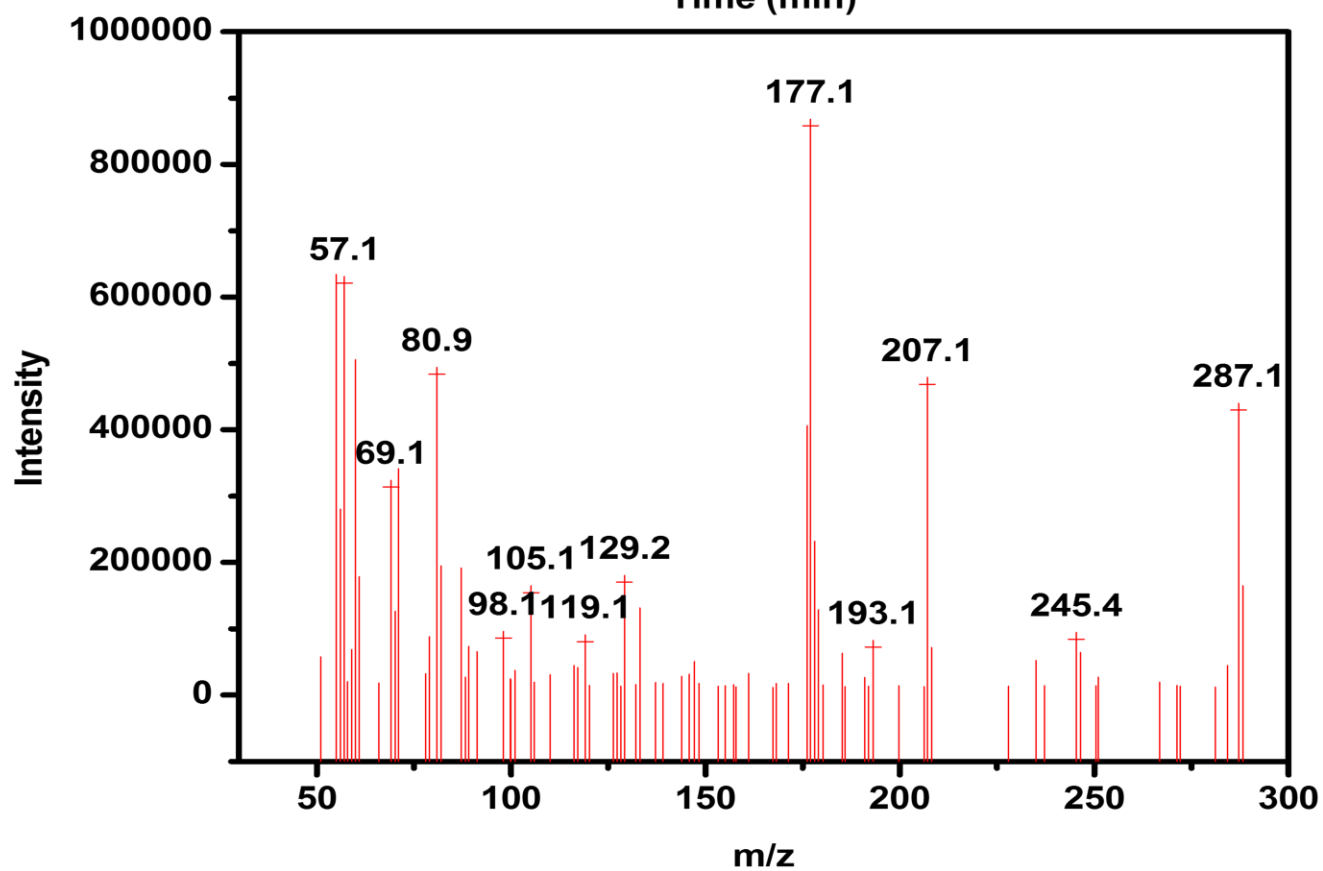

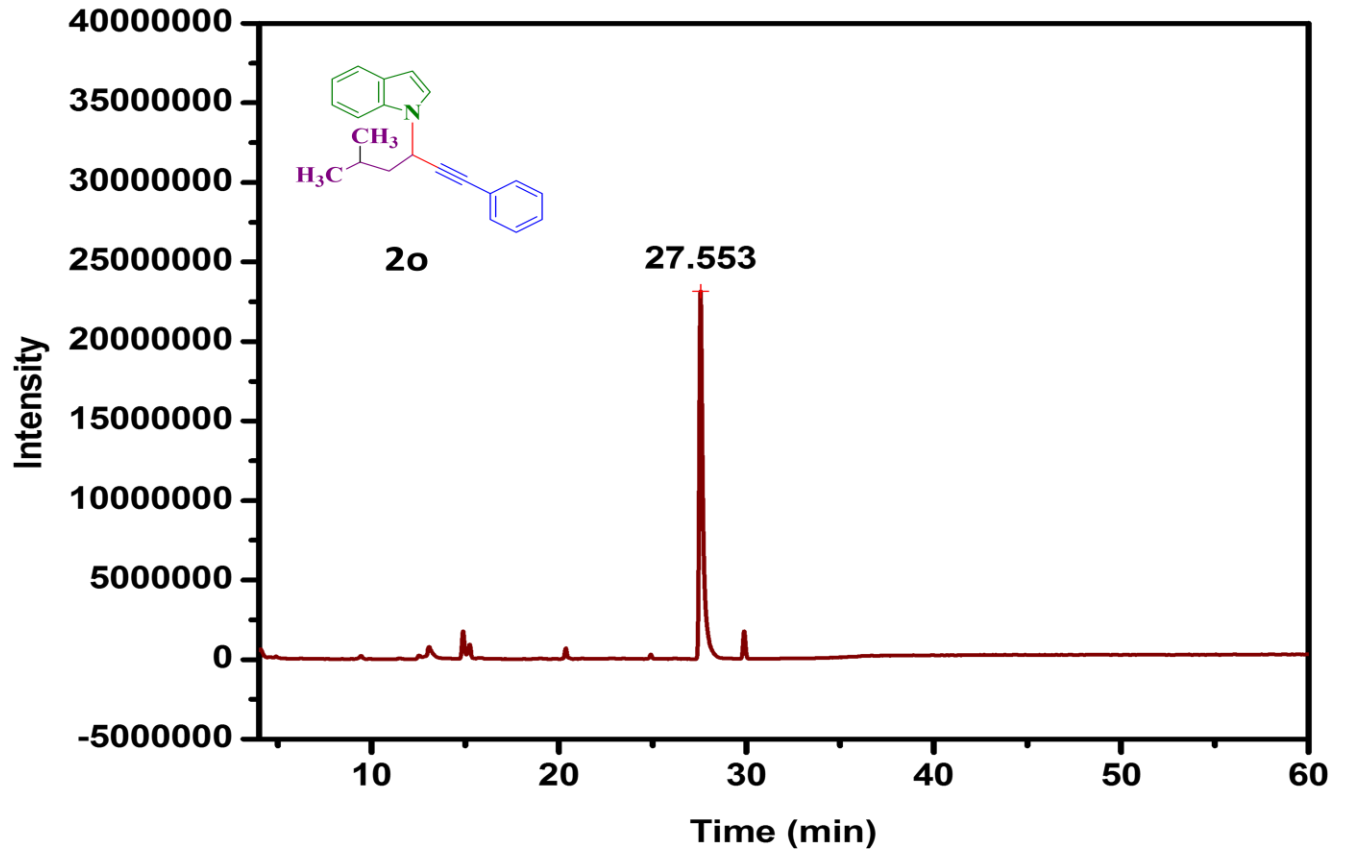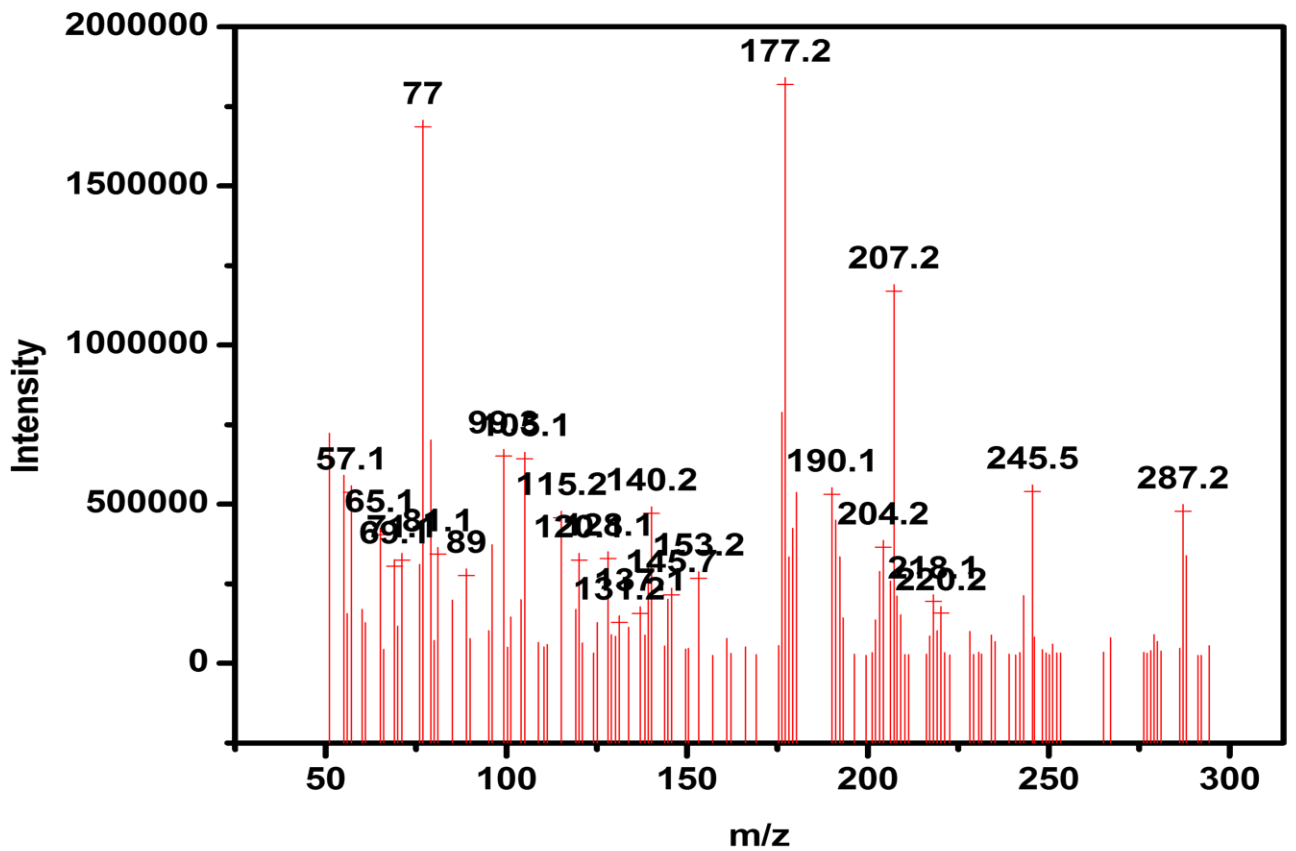

Supplement: d1nj02994k1.pdf [file d1nj02994k1.pdf]
